# Supplementary material
Source: PubMed Central journal article supplement (PMC4540723)
Supplement: 12248_2015_9792_MOESM1_ESM.pdf [file 12248_2015_9792_MOESM1_ESM.pdf]

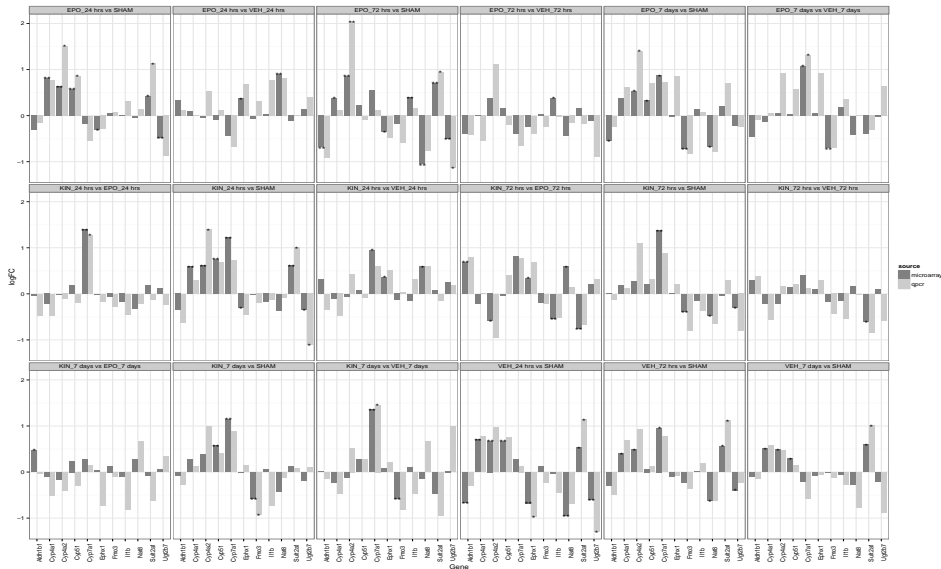

Supplementary Figure 1: Barplots showing the consistency between microarray and qPCR data. Each individual plot shows data for a given contrast, indicated in the header for the plot. The horizontal axis separates the data by gene, and the vertical axis presents the log fold change between the two sample types, which can be inferred by the plot header (e.g., EPO\_24 hrs vs SHAM indicates the comparison is EPO 24 hours - SHAM, so a positive fold change indicates up-regulation in EPO treated samples, and a negative fold change indicates down-regulation in EPO treated samples). Asterisks indicate significance - a single asterisk indicates  $p < 0.05$  and two asterisks indicate  $p < 0.005$ .
