# Supplementary material
Source: PubMed Central journal article supplement (PMC4540723)
Supplement: 12248_2015_9792_MOESM2_ESM.pdf [file 12248_2015_9792_MOESM2_ESM.pdf]

Supplementary Table 1. Effect of TBI on Brain Inflammatory Genes:  
Genes differentially expressed (>1.5 fold change,  $p < 0.05$ )

| Affymetrix ID        | Gene Symbol | Genes                                                       | Vehicle+TBI Sham |
|----------------------|-------------|-------------------------------------------------------------|------------------|
| <b>24 h post TBI</b> |             |                                                             |                  |
| 10770082             | Ifi204      | interferon activated gene 204                               | 2.46             |
| 10787491             | Ifi30       | interferon gamma inducible protein 30                       | 4.10             |
| 10701924             | Ifngr1      | interferon gamma receptor 1                                 | 1.67             |
| 10712171             | Ifitm1      | interferon induced transmembrane protein 1                  | 3.65             |
| 10726679             | Ifitm2      | interferon induced transmembrane protein 2                  | 1.99             |
| 10726682             | Ifitm3      | interferon induced transmembrane protein 3                  | 3.34             |
| 10845708             | Ifih1       | interferon induced with helicase C domain 1                 | 1.71             |
| 10733553             | Irf1        | interferon regulatory factor 1                              | 2.19             |
| 10854190             | Irf5        | interferon regulatory factor 5                              | 1.54             |
| 10726758             | Irf7        | interferon regulatory factor 7                              | 1.79             |
| 10808431             | Irf8        | interferon regulatory factor 8                              | 2.44             |
| 10780433             | Irf9        | interferon regulatory factor 9                              | 2.34             |
| 10708015             | Isg20       | interferon stimulated exonuclease gene 20                   | 1.50             |
| 10729791             | Ifit1       | interferon-induced protein with tetratricopeptide repeats 1 | 5.54             |
| 10714903             | Ifit3       | interferon-induced protein with tetratricopeptide repeats 3 | 6.04             |
| 10940689             | Ifrd1       | interferon-related developmental regulator 1                | 1.91             |
| 10849841             | Il1b        | interleukin 1 beta                                          | 6.82             |
| 10935076             | Il1rapl2    | interleukin 1 receptor accessory protein-like 2             | 0.61             |
| 10834109             | Il1rn       | interleukin 1 receptor antagonist                           | 17.23            |
| 10922826             | Il1r1       | interleukin 1 receptor, type I                              | 1.92             |
| 10922816             | Il1r2       | interleukin 1 receptor, type II                             | 7.10             |
| 10902662             | Ilak3       | interleukin-1 receptor-associated kinase 3                  | 2.16             |
| 10898862             | Ilak4       | interleukin-1 receptor-associated kinase 4                  | 1.76             |
| 10938654             | Il2rg       | interleukin 2 receptor, gamma                               | 3.96             |
| 10710782             | Il4ra       | interleukin 4 receptor, alpha                               | 2.61             |
| 10859799             | Il6         | interleukin 6                                               | 2.53             |
| 10824530             | Il6r        | interleukin 6 receptor                                      | 2.09             |
| 10821851             | Il7r        | interleukin 7 receptor                                      | 1.74             |
| 10750193             | Il10rb      | interleukin 10 receptor, beta                               | 2.50             |
| 10703953             | Il11        | interleukin 11                                              | 3.12             |
| 10815873             | Il12a       | interleukin 12A                                             | 0.65             |
| 10936365             | Il13ra1     | interleukin 13 receptor, alpha 1                            | 2.84             |
| 10858315             | Il17ra      | interleukin 17 receptor A                                   | 2.09             |
| 10789857             | Il17rb      | interleukin 17 receptor B                                   | 2.10             |
| 10909874             | Il18        | interleukin 18                                              | 1.93             |
| 10922882             | Il18rap     | interleukin 18 receptor accessory protein                   | 2.38             |
| 10919537             | Il20rb      | interleukin 20 receptor beta                                | 2.22             |
| 10701934             | Il22ra2     | interleukin 22 receptor, alpha 2                            | 1.58             |
| 10828021             | Tnf         | tumor necrosis factor (TNF superfamily, member 2)           | 1.55             |
| 10858967             | Tnfrsf1a    | tumor necrosis factor receptor superfamily, member 1a       | 3.05             |
| 10881424             | Tnfrsf1b    | tumor necrosis factor receptor superfamily, member 1b       | 3.84             |
| 10814528             | Tnfsf10     | tumor necrosis factor (ligand) superfamily, member 10       | 0.40             |
| 10781321             | Tnfrsf10b   | tumor necrosis factor receptor superfamily, member 10b      | 1.54             |
| 10793038             | Tnfsf13b    | tumor necrosis factor (ligand) superfamily, member 13b      | 1.59             |
| 10740869             | Tnfrsf12a   | tumor necrosis factor receptor superfamily, member 12a      | 3.76             |
| 10727109             | Tnfrsf26    | tumor necrosis factor receptor superfamily, member 26       | 2.03             |
| <b>72 h post TBI</b> |             |                                                             |                  |
| 10787491             | Ifi30       | interferon gamma inducible protein 30                       | 8.67             |
| 10701924             | Ifngr1      | interferon gamma receptor 1                                 | 2.32             |
| 10712171             | Ifitm1      | interferon induced transmembrane protein 1                  | 8.98             |

|          |           |                                                             |      |
|----------|-----------|-------------------------------------------------------------|------|
| 10726679 | Ifitm2    | interferon induced transmembrane protein 2                  | 3.96 |
| 10726682 | Ifitm3    | interferon induced transmembrane protein 3                  | 3.07 |
| 10845708 | Ifih1     | interferon induced with helicase C domain 1                 | 1.94 |
| 10733553 | Irf1      | interferon regulatory factor 1                              | 2.11 |
| 10854190 | Irf5      | interferon regulatory factor 5                              | 2.49 |
| 10726758 | Irf7      | interferon regulatory factor 7                              | 1.59 |
| 10808431 | Irf8      | interferon regulatory factor 8                              | 5.12 |
| 10780433 | Irf9      | interferon regulatory factor 9                              | 2.04 |
| 10738415 | Ifi35     | interferon-induced protein 35                               | 1.58 |
| 10827349 | Ifi44     | interferon-induced protein 44                               | 1.62 |
| 10729791 | Ifit1     | interferon-induced protein with tetratricopeptide repeats 1 | 1.54 |
| 10714907 | Ifit1     | interferon-induced protein with tetratricopeptide repeats 1 | 1.66 |
| 10849833 | Il1a      | interleukin 1 alpha                                         | 2.15 |
| 10849841 | Il1b      | interleukin 1 beta                                          | 1.84 |
| 10834109 | Il1rn     | interleukin 1 receptor antagonist                           | 9.09 |
| 10922826 | Il1r1     | interleukin 1 receptor, type I                              | 1.88 |
| 10922816 | Il1r2     | interleukin 1 receptor, type II                             | 1.61 |
| 10938654 | Il2rg     | interleukin 2 receptor, gamma                               | 4.34 |
| 10710782 | Il4ra     | interleukin 4 receptor, alpha                               | 3.07 |
| 10824530 | Il6r      | interleukin 6 receptor                                      | 2.05 |
| 10821851 | Il7r      | interleukin 7 receptor                                      | 2.84 |
| 10916973 | Il10ra    | interleukin 10 receptor, alpha                              | 2.10 |
| 10750193 | Il10rb    | interleukin 10 receptor, beta                               | 3.24 |
| 10754983 | Il13ra1   | interleukin 13 receptor, alpha 1                            | 3.08 |
| 10858315 | Il17ra    | interleukin 17 receptor A                                   | 2.07 |
| 10789857 | Il17rb    | interleukin 17 receptor B                                   | 2.12 |
| 10909874 | Il18      | interleukin 18                                              | 3.37 |
| 10724131 | Il18bp    | interleukin 18 binding protein                              | 1.66 |
| 10922871 | Il18r1    | interleukin 18 receptor 1                                   | 1.62 |
| 10919537 | Il20rb    | interleukin 20 receptor beta                                | 5.73 |
| 10710795 | Il21r     | interleukin 21 receptor                                     | 2.00 |
| 10714745 | Il33      | interleukin 33                                              | 1.66 |
| 10858967 | Tnfrsf1a  | tumor necrosis factor receptor superfamily, member 1a       | 3.25 |
| 10881424 | Tnfrsf1b  | tumor necrosis factor receptor superfamily, member 1b       | 4.47 |
| 10793038 | Tnfsf13b  | tumor necrosis factor (ligand) superfamily, member 13b      | 2.67 |
| 10740869 | Tnfrsf12a | tumor necrosis factor receptor superfamily, member 12a      | 2.27 |
| 10727109 | Tnfrsf26  | tumor necrosis factor receptor superfamily, member 26       | 1.67 |

---

**7 days**

|          |        |                                                             |      |
|----------|--------|-------------------------------------------------------------|------|
| 10701924 | Ifngr1 | interferon gamma receptor 1                                 | 2.12 |
| 10712171 | Ifitm1 | interferon induced transmembrane protein 1                  | 4.21 |
| 10726679 | Ifitm2 | interferon induced transmembrane protein 2                  | 2.30 |
| 10726682 | Ifitm3 | interferon induced transmembrane protein 3                  | 3.48 |
| 10845708 | Ifih1  | interferon induced with helicase C domain 1                 | 2.78 |
| 10733553 | Irf1   | interferon regulatory factor 1                              | 2.26 |
| 10854190 | Irf5   | interferon regulatory factor 5                              | 2.52 |
| 10726758 | Irf7   | interferon regulatory factor 7                              | 4.83 |
| 10808431 | Irf8   | interferon regulatory factor 8                              | 4.90 |
| 10780433 | Irf9   | interferon regulatory factor 9                              | 2.49 |
| 10708015 | Isg20  | interferon stimulated exonuclease gene 20                   | 1.85 |
| 10886573 | Ifi27  | interferon, alpha-inducible protein 27                      | 2.34 |
| 10738415 | Ifi35  | interferon-induced protein 35                               | 1.53 |
| 10827349 | Ifi44  | interferon-induced protein 44                               | 2.65 |
| 10834014 | Ifi44l | interferon-induced protein 44-like                          | 3.53 |
| 10714900 | Ifit2  | interferon-induced protein with tetratricopeptide repeats 2 | 2.57 |
| 10714903 | Ifit3  | interferon-induced protein with tetratricopeptide repeats 3 | 3.98 |
| 10849833 | Il1a   | interleukin 1 alpha                                         | 2.08 |

|          |           |                                                        |      |
|----------|-----------|--------------------------------------------------------|------|
| 10834109 | Il1rn     | interleukin 1 receptor antagonist                      | 2.66 |
| 10922826 | Il1r1     | interleukin 1 receptor, type I                         | 1.54 |
| 10922857 | Il1rl1    | interleukin 1 receptor-like 1                          | 4.29 |
| 10916973 | Il10ra    | interleukin 10 receptor, alpha                         | 2.01 |
| 10750193 | Il10rb    | interleukin 10 receptor, beta                          | 2.65 |
| 10754983 | Il13ra1   | interleukin 13 receptor, alpha 1                       | 2.35 |
| 10858315 | Il17ra    | interleukin 17 receptor A                              | 1.74 |
| 10789857 | Il17rb    | interleukin 17 receptor B                              | 1.68 |
| 10909874 | Il18      | interleukin 18                                         | 2.47 |
| 10922871 | Il18r1    | interleukin 18 receptor 1                              | 1.51 |
| 10938654 | Il2rg     | interleukin 2 receptor, gamma                          | 2.23 |
| 10710795 | Il21r     | interleukin 21 receptor                                | 1.52 |
| 10710782 | Il4ra     | interleukin 4 receptor, alpha                          | 1.56 |
| 10824530 | Il6r      | interleukin 6 receptor                                 | 1.98 |
| 10821851 | Il7r      | interleukin 7 receptor                                 | 1.95 |
| 10793038 | Tnfsf13b  | tumor necrosis factor (ligand) superfamily, member 13b | 2.31 |
| 10765092 | Tnfsf4    | tumor necrosis factor (ligand) superfamily, member 4   | 1.75 |
| 10858967 | Tnfrsf1a  | tumor necrosis factor receptor superfamily, member 1a  | 2.52 |
| 10881424 | Tnfrsf1b  | tumor necrosis factor receptor superfamily, member 1b  | 3.05 |
| 10824951 | Tnfaip8l2 | tumor necrosis factor, alpha-induced protein 8-like 2  | 1.64 |

---
