# Supplementary material
Source: PubMed Central journal article supplement (PMC4540723)
Supplement: 12248_2015_9792_MOESM3_ESM.pdf [file 12248_2015_9792_MOESM3_ESM.pdf]

| Supplementary Table 2: Ingenuity Canonical Pathways: Vehicle Sham Contrast |          |          |                                                  |
|----------------------------------------------------------------------------|----------|----------|--------------------------------------------------|
| Canonical Pathways                                                         | p-value  | Ratio    | Genes                                            |
| <b>24 h post-TBI</b>                                                       |          |          |                                                  |
| Cholesterol Biosynthesis I                                                 | 1.17E-07 | 1.25E-01 | SQLE,HSD17B7,MSMO1,LSS,CYP51A1                   |
| Cholesterol Biosynthesis II (via 24,25-dihydrolanosterol)                  | 1.17E-07 | 1.25E-01 | SQLE,HSD17B7,MSMO1,LSS,CYP51A1                   |
| Cholesterol Biosynthesis III (via Desmosterol)                             | 1.17E-07 | 1.25E-01 | SQLE,HSD17B7,MSMO1,LSS,CYP51A1                   |
| Zymosterol Biosynthesis                                                    | 1.95E-05 | 1.36E-01 | HSD17B7,MSMO1,CYP51A1                            |
| LXR/RXR Activation                                                         | 5.75E-04 | 4.41E-02 | SCD,LY96,C4B (includes others),IL1R1,LBP,CYP51A1 |
| GADD45 Signaling                                                           | 6.17E-04 | 1.36E-01 | PCNA,CDKN1A,CCND1                                |
| Aryl Hydrocarbon Receptor Signaling                                        | 1.58E-03 | 3.73E-02 | GSTA3,Gstm3,NQO1,CDKN1A,CCND1,MGST3              |
| Glutathione-mediated Detoxification                                        | 1.74E-03 | 6.67E-02 | GSTA3,Gstm3,MGST3                                |
| Pathogenesis of Multiple Sclerosis                                         | 2.75E-03 | 2.22E-01 | CXCL10,CXCL9                                     |
| LPS/IL-1 Mediated Inhibition of RXR Function                               | 3.31E-03 | 2.93E-02 | GSTA3,LY96,SLC27A5,Gstm3,IL1R1,LBP,MGST3         |
| Circadian Rhythm Signaling                                                 | 3.72E-03 | 8.11E-02 | PER3,ARNTL,PER2                                  |
| IL-9 Signaling                                                             | 4.07E-03 | 7.5E-02  | SOCS3,STAT3,JAK3                                 |
| Mevalonate Pathway I                                                       | 4.37E-03 | 7.14E-02 | ACAT2,IDI1                                       |
| IL-10 Signaling                                                            | 4.47E-03 | 5.13E-02 | SOCS3,STAT3,IL1R1,LBP                            |
| JAK/Stat Signaling                                                         | 4.47E-03 | 5.71E-02 | SOCS3,CDKN1A,STAT3,JAK3                          |
| IL-6 Signaling                                                             | 5.50E-03 | 4.03E-02 | SOCS3,STAT3,IL1R1,LBP,MAPKAPK2                   |
| VDR/RXR Activation                                                         | 6.61E-03 | 4.94E-02 | CXCL10,PPARD,CDKN1A,HSD17B2                      |
| NRF2-mediated Oxidative Stress Response                                    | 6.92E-03 | 3.12E-02 | GSTA3,AKR7A3,Gstm3,NQO1,MGST3,EPHX1              |
| Methylglyoxal Degradation III                                              | 7.41E-03 | 8.7E-02  | AKR7A3,FAM213B                                   |
| p53 Signaling                                                              | 7.59E-03 | 4.17E-02 | PCNA,CDKN1A,GNL3,CCND1                           |
| iNOS Signaling                                                             | 8.13E-03 | 5.66E-02 | LY96,LBP,JAK3                                    |
| Lanosterol Biosynthesis                                                    | 1.00E-02 | 3.33E-01 | LSS                                              |
| Estrogen Biosynthesis                                                      | 1.55E-02 | 4.41E-02 | HSD17B7,HSD17B2,CYP51A1                          |
| Cell Cycle: G1/S Checkpoint Regulation                                     | 1.55E-02 | 4.55E-02 | CDKN1A,GNL3,CCND1                                |
| ErbB2-ErbB3 Signaling                                                      | 1.70E-02 | 5E-02    | STAT3,JAK3,CCND1                                 |
| Estrogen-mediated S-phase Entry                                            | 1.86E-02 | 7.14E-02 | CDKN1A,CCND1                                     |
| Pancreatic Adenocarcinoma Signaling                                        | 1.91E-02 | 3.33E-02 | CDKN1A,STAT3,JAK3,CCND1                          |
| Role of JAK1 and JAK3 in $\gamma$ c Cytokine Signaling                     | 2.00E-02 | 4.48E-02 | SOCS3,STAT3,JAK3                                 |
| Epoxyqualene Biosynthesis                                                  | 2.00E-02 | 1.11E-01 | SQLE                                             |
| CD40 Signaling                                                             | 2.09E-02 | 4.29E-02 | STAT3,MAPKAPK2,JAK3                              |
| Acute Phase Response Signaling                                             | 2.09E-02 | 2.81E-02 | SOCS3,C4B (includes others),STAT3,IL1R1,LBP      |
| Estrogen-Dependent Breast Cancer Signaling                                 | 2.34E-02 | 4.17E-02 | HSD17B7,CCND1,HSD17B2                            |
| IL-22 Signaling                                                            | 2.40E-02 | 8E-02    | SOCS3,STAT3                                      |
| IL-15 Production                                                           | 2.63E-02 | 6.45E-02 | PTK6,JAK3                                        |
| Role of JAK family kinases in IL-6-type Cytokine Signaling                 | 2.63E-02 | 7.41E-02 | SOCS3,STAT3                                      |
| Catecholamine Biosynthesis                                                 | 3.02E-02 | 6.67E-02 | DDC                                              |
| Trans, trans-farnesyl Diphosphate Biosynthesis                             | 3.02E-02 | 1E-01    | IDI1                                             |
| Xenobiotic Metabolism Signaling                                            | 3.39E-02 | 2.01E-02 | GSTA3,Ces2g,Gstm3,NQO1,MGST3,Ces2b/Ces2c         |
| MIF-mediated Glucocorticoid Regulation                                     | 3.63E-02 | 4.76E-02 | LY96,MIF                                         |

|                                                                                |          |          |                                      |
|--------------------------------------------------------------------------------|----------|----------|--------------------------------------|
| FXR/RXR Activation                                                             | 3.89E-02 | 2.97E-02 | SLC27A5,PKLR,G6PC                    |
| Cell Cycle Regulation by BTG Family Proteins                                   | 3.89E-02 | 5.56E-02 | CCND1,CCRN4L                         |
| Role of JAK2 in Hormone-like Cytokine Signaling                                | 3.89E-02 | 5.56E-02 | SOCS3,STAT3                          |
| Spermine and Spermidine Degradation I                                          | 3.98E-02 | 7.14E-02 | SAT1                                 |
| Eumelanin Biosynthesis                                                         | 3.98E-02 | 9.09E-02 | MIF                                  |
| Myo-inositol Biosynthesis                                                      | 3.98E-02 | 1.25E-01 | ISYNA1                               |
| TR/RXR Activation                                                              | 4.17E-02 | 3.12E-02 | SREBF2,G6PC,ME1                      |
| Hepatic Fibrosis / Hepatic Stellate Cell Activation                            | 4.17E-02 | 2.74E-02 | LY96,CXCL9,IL1R1,LBP                 |
| Prostate Cancer Signaling                                                      | 4.27E-02 | 3.06E-02 | SRD5A1,CDKN1A,CCND1                  |
| Oncostatin M Signaling                                                         | 4.37E-02 | 5.71E-02 | STAT3,JAK3                           |
| Stearate Biosynthesis I (Animals)                                              | 4.57E-02 | 4E-02    | SLC27A5,FAM213B                      |
| Serotonin and Melatonin Biosynthesis                                           | 4.90E-02 | 6.25E-02 | DDC                                  |
| Glycogen Biosynthesis II (from UDP-D-Glucose)                                  | 4.90E-02 | 8.33E-02 | UGP2                                 |
| MIF Regulation of Innate Immunity                                              | 5.62E-02 | 4E-02    | LY96,MIF                             |
| Retinol Biosynthesis                                                           | 5.62E-02 | 3.28E-02 | Ces2g,Ces2b/Ces2c                    |
| Role of Macrophages, Fibroblasts and Endothelial Cells in Rheumatoid Arthritis | 5.62E-02 | 1.8E-02  | SOCS3,MIF,STAT3,IL1R1,MAPKAPK2,CCND1 |
| Thyroid Cancer Signaling                                                       | 5.89E-02 | 4.76E-02 | CXCL10,CCND1                         |
| Superoxide Radicals Degradation                                                | 5.89E-02 | 1.25E-01 | NQO1                                 |
| Melanoma Signaling                                                             | 6.46E-02 | 4.35E-02 | CDKN1A,CCND1                         |
| Acetone Degradation I (to Methylglyoxal)                                       | 6.46E-02 | 3.64E-02 | FAM213B,CYP51A1                      |
| Phosphatidylethanolamine Biosynthesis II                                       | 6.92E-02 | 5.56E-02 | CHKA                                 |
| Phosphatidylcholine Biosynthesis I                                             | 6.92E-02 | 5.88E-02 | CHKA                                 |
| HGF Signaling                                                                  | 7.08E-02 | 2.86E-02 | CDKN1A,STAT3,CCND1                   |
| Toll-like Receptor Signaling                                                   | 7.59E-02 | 3.64E-02 | LY96,LBP                             |
| Ketolysis                                                                      | 7.76E-02 | 5.56E-02 | ACAT2                                |
| Role of CHK Proteins in Cell Cycle Checkpoint Control                          | 8.51E-02 | 3.57E-02 | PCNA,CDKN1A                          |
| Oleate Biosynthesis II (Animals)                                               | 8.71E-02 | 5.26E-02 | SCD                                  |
| Hereditary Breast Cancer Signaling                                             | 8.91E-02 | 2.34E-02 | NPM1,CDKN1A,CCND1                    |
| Breast Cancer Regulation by Stathmin1                                          | 9.55E-02 | 1.93E-02 | STMN1,TUBA1A,CDKN1A,TUBB2A           |
| p38 MAPK Signaling                                                             | 9.55E-02 | 2.56E-02 | DUSP1,IL1R1,MAPKAPK2                 |
| Glutaryl-CoA Degradation                                                       | 9.55E-02 | 4.17E-02 | ACAT2                                |
| Ketogenesis                                                                    | 9.55E-02 | 4.76E-02 | ACAT2                                |
| Guanosine Nucleotides Degradation III                                          | 9.55E-02 | 4.55E-02 | NT5C3A                               |
| Type II Diabetes Mellitus Signaling                                            | 1.04E-01 | 1.86E-02 | SOCS3,SLC27A5,PKLR                   |
| Urate Biosynthesis/Inosine 5'-phosphate Degradation                            | 1.06E-01 | 4.35E-02 | NT5C3A                               |
| Adenosine Nucleotides Degradation II                                           | 1.06E-01 | 4E-02    | NT5C3A                               |
| PI3K/AKT Signaling                                                             | 1.06E-01 | 2.08E-02 | CDKN1A,JAK3,CCND1                    |
| PXR/RXR Activation                                                             | 1.06E-01 | 2.3E-02  | SCD,G6PC                             |
| Hypoxia Signaling in the Cardiovascular System                                 | 1.13E-01 | 3.03E-02 | NQO1,UBE2V2                          |
| Androgen Biosynthesis                                                          | 1.15E-01 | 3.85E-02 | SRD5A1                               |
| Pyrimidine Deoxyribonucleotides De Novo Biosynthesis I                         | 1.15E-01 | 2.78E-02 | RRM2                                 |
| Bile Acid Biosynthesis, Neutral Pathway                                        | 1.15E-01 | 1.72E-02 | SLC27A5                              |
| IL-15 Signaling                                                                | 1.16E-01 | 2.99E-02 | STAT3,JAK3                           |

|                                                      |          |          |                         |
|------------------------------------------------------|----------|----------|-------------------------|
| IL-17A Signaling in Airway Cells                     | 1.20E-01 | 2.78E-02 | STAT3,JAK3              |
| GM-CSF Signaling                                     | 1.23E-01 | 2.94E-02 | STAT3,CCND1             |
| Fatty Acid Activation                                | 1.24E-01 | 5.26E-02 | SLC27A5                 |
| Isoleucine Degradation I                             | 1.24E-01 | 3.33E-02 | ACAT2                   |
| Oxidative Ethanol Degradation III                    | 1.24E-01 | 2.5E-02  | ACSS2                   |
| Tryptophan Degradation X (Mammalian, via Tryptamine) | 1.33E-01 | 3.45E-02 | DDC                     |
| Putrescine Degradation III                           | 1.33E-01 | 3.33E-02 | SAT1                    |
| Hepatic Cholestasis                                  | 1.33E-01 | 1.72E-02 | LY96,IL1R1,LBP          |
| cAMP-mediated signaling                              | 1.35E-01 | 1.81E-02 | AKAP5,DUSP1,CREM,STAT3  |
| Growth Hormone Signaling                             | 1.40E-01 | 2.63E-02 | SOCS3,STAT3             |
| RAN Signaling                                        | 1.41E-01 | 4.17E-02 | KPNA4                   |
| Glutathione Redox Reactions I                        | 1.41E-01 | 4.35E-02 | MGST3                   |
| Colanic Acid Building Blocks Biosynthesis            | 1.41E-01 | 2.7E-02  | UGP2                    |
| Ethanol Degradation IV                               | 1.41E-01 | 3.45E-02 | ACSS2                   |
| IL-17 Signaling                                      | 1.47E-01 | 2.7E-02  | CXCL10,MAPKAPK2         |
| Mismatch Repair in Eukaryotes                        | 1.50E-01 | 4.17E-02 | PCNA                    |
| NAD Salvage Pathway II                               | 1.50E-01 | 3.23E-02 | NT5C3A                  |
| Leptin Signaling in Obesity                          | 1.50E-01 | 2.41E-02 | SOCS3,STAT3             |
| Cyclins and Cell Cycle Regulation                    | 1.50E-01 | 2.25E-02 | CDKN1A,CCND1            |
| Mitochondrial L-carnitine Shuttle Pathway            | 1.58E-01 | 4.55E-02 | SLC27A5                 |
| Prolactin Signaling                                  | 1.64E-01 | 2.5E-02  | SOCS3,STAT3             |
| Acute Myeloid Leukemia Signaling                     | 1.64E-01 | 2.44E-02 | STAT3,CCND1             |
| HER-2 Signaling in Breast Cancer                     | 1.64E-01 | 2.5E-02  | CDKN1A,CCND1            |
| $\gamma$ -linolenate Biosynthesis II (Animals)       | 1.67E-01 | 4E-02    | SLC27A5                 |
| Aldosterone Signaling in Epithelial Cells            | 1.71E-01 | 1.79E-02 | SCNN1A,DUSP1,HSPA4L     |
| PDGF Signaling                                       | 1.75E-01 | 2.35E-02 | STAT3,JAK3              |
| Maturity Onset Diabetes of Young (MODY) Signaling    | 1.75E-01 | 3.23E-02 | PKLR                    |
| Systemic Lupus Erythematosus Signaling               | 1.81E-01 | 1.21E-02 | CREM,SNRFB2,LSM3        |
| Role of JAK1, JAK2 and TYK2 in Interferon Signaling  | 1.92E-01 | 3.7E-02  | STAT3                   |
| Glycolysis I                                         | 1.92E-01 | 2.22E-02 | PKLR                    |
| Bladder Cancer Signaling                             | 1.94E-01 | 2.2E-02  | CDKN1A,CCND1            |
| Polyamine Regulation in Colon Cancer                 | 2.00E-01 | 3.45E-02 | SAT1                    |
| Gluconeogenesis I                                    | 2.00E-01 | 2E-02    | ME1                     |
| FGF Signaling                                        | 2.05E-01 | 2.17E-02 | STAT3,MAPKAPK2          |
| HMGB1 Signaling                                      | 2.16E-01 | 2.02E-02 | HAT1,IL1R1              |
| IL-17A Signaling in Gastric Cells                    | 2.16E-01 | 4E-02    | CXCL10                  |
| Chronic Myeloid Leukemia Signaling                   | 2.19E-01 | 1.9E-02  | CDKN1A,CCND1            |
| Glucocorticoid Receptor Signaling                    | 2.20E-01 | 1.36E-02 | DUSP1,CDKN1A,STAT3,JAK3 |
| Glioma Signaling                                     | 2.23E-01 | 1.79E-02 | CDKN1A,CCND1            |
| Ethanol Degradation II                               | 2.24E-01 | 2.33E-02 | ACSS2                   |
| Mouse Embryonic Stem Cell Pluripotency               | 2.27E-01 | 2.02E-02 | STAT3,JAK3              |
| PPAR Signaling                                       | 2.31E-01 | 1.9E-02  | PPAR,IL1R1              |
| Cell Cycle Control of Chromosomal Replication        | 2.32E-01 | 3.23E-02 | RPA3                    |

|                                                                          |          |          |                        |
|--------------------------------------------------------------------------|----------|----------|------------------------|
| IGF-1 Signaling                                                          | 2.34E-01 | 1.9E-02  | SOCS3,STAT3            |
| Role of Hypercytokinemia/hyperchemokine in the Pathogenesis of Influenza | 2.40E-01 | 2.27E-02 | CXCL10                 |
| Complement System                                                        | 2.40E-01 | 2.86E-02 | C4B (includes others)  |
| Fatty Acid $\beta$ -oxidation I                                          | 2.48E-01 | 2.22E-02 | SLC27A5                |
| Serotonin Receptor Signaling                                             | 2.48E-01 | 2.17E-02 | DDC                    |
| Nucleotide Excision Repair Pathway                                       | 2.55E-01 | 2.86E-02 | RPA3                   |
| Type I Diabetes Mellitus Signaling                                       | 2.57E-01 | 1.65E-02 | SOCS3,IL1R1            |
| Primary Immunodeficiency Signaling                                       | 2.70E-01 | 1.61E-02 | JAK3                   |
| Neuroprotective Role of THOP1 in Alzheimer's Disease                     | 2.70E-01 | 1.85E-02 | MME                    |
| Triacylglycerol Biosynthesis                                             | 2.70E-01 | 2.17E-02 | LPIN1                  |
| Role of NANOG in Mammalian Embryonic Stem Cell Pluripotency              | 2.79E-01 | 1.75E-02 | STAT3,JAK3             |
| 14-3-3-mediated Signaling                                                | 2.83E-01 | 1.71E-02 | TUBA1A,TUBB2A          |
| PTEN Signaling                                                           | 3.09E-01 | 1.48E-02 | CDKN1A,CCND1           |
| Transcriptional Regulatory Network in Embryonic Stem Cells               | 3.21E-01 | 2.5E-02  | STAT3                  |
| Cell Cycle: G2/M DNA Damage Checkpoint Regulation                        | 3.21E-01 | 2.08E-02 | CDKN1A                 |
| Role of IL-17F in Allergic Inflammatory Airway Diseases                  | 3.27E-01 | 2.08E-02 | CXCL10                 |
| Bupropion Degradation                                                    | 3.34E-01 | 1.92E-02 | CYP51A1                |
| Insulin Receptor Signaling                                               | 3.57E-01 | 1.41E-02 | SCNN1A,SOCS3           |
| EGF Signaling                                                            | 3.67E-01 | 1.92E-02 | STAT3                  |
| Colorectal Cancer Metastasis Signaling                                   | 3.73E-01 | 1.17E-02 | STAT3,JAK3,CCND1       |
| Molecular Mechanisms of Cancer                                           | 3.73E-01 | 1.06E-02 | HAT1,CDKN1A,JAK3,CCND1 |
| CNTF Signaling                                                           | 3.74E-01 | 1.82E-02 | STAT3                  |
| Role of IL-17A in Arthritis                                              | 3.99E-01 | 1.59E-02 | MAPKAPK2               |
| Glioblastoma Multiforme Signaling                                        | 4.04E-01 | 1.22E-02 | CDKN1A,CCND1           |
| TREM1 Signaling                                                          | 4.05E-01 | 1.41E-02 | STAT3                  |
| Endometrial Cancer Signaling                                             | 4.05E-01 | 1.75E-02 | CCND1                  |
| IL-2 Signaling                                                           | 4.05E-01 | 1.72E-02 | JAK3                   |
| Glutamate Receptor Signaling                                             | 4.05E-01 | 1.45E-02 | SLC1A2                 |
| Germ Cell-Sertoli Cell Junction Signaling                                | 4.22E-01 | 1.22E-02 | TUBA1A,TUBB2A          |
| Thrombopoietin Signaling                                                 | 4.23E-01 | 1.59E-02 | STAT3                  |
| Gap Junction Signaling                                                   | 4.29E-01 | 1.14E-02 | TUBA1A,TUBB2A          |
| Role of BRCA1 in DNA Damage Response                                     | 4.29E-01 | 1.54E-02 | CDKN1A                 |
| ATM Signaling                                                            | 4.29E-01 | 1.64E-02 | CDKN1A                 |
| Nicotine Degradation III                                                 | 4.35E-01 | 1.1E-02  | CYP51A1                |
| Melatonin Degradation I                                                  | 4.35E-01 | 1.2E-02  | CYP51A1                |
| Dopamine-DARPP32 Feedback in cAMP Signaling                              | 4.46E-01 | 1.09E-02 | KCNJ15,CREM            |
| Pyridoxal 5'-phosphate Salvage Pathway                                   | 4.46E-01 | 1.39E-02 | G6PC                   |
| Aggrin Interactions at Neuromuscular Junction                            | 4.52E-01 | 1.45E-02 | PKLR                   |
| T Helper Cell Differentiation                                            | 4.57E-01 | 1.39E-02 | STAT3                  |
| Antiproliferative Role of Somatostatin Receptor 2                        | 4.57E-01 | 1.41E-02 | CDKN1A                 |
| Communication between Innate and Adaptive Immune Cells                   | 4.62E-01 | 9.17E-03 | CXCL10                 |
| Wnt/ $\beta$ -catenin Signaling                                          | 4.66E-01 | 1.16E-02 | PPARD,CCND1            |
| Non-Small Cell Lung Cancer Signaling                                     | 4.68E-01 | 1.27E-02 | CCND1                  |

|                                                         |          |          |                        |
|---------------------------------------------------------|----------|----------|------------------------|
| Role of MAPK Signaling in the Pathogenesis of Influenza | 4.68E-01 | 1.45E-02 | CXCL10                 |
| Nicotine Degradation II                                 | 4.73E-01 | 9.71E-03 | CYP51A1                |
| Protein Kinase A Signaling                              | 4.82E-01 | 9.78E-03 | AKAP5,DUSP1,CREM,CDKN3 |
| RAR Activation                                          | 4.86E-01 | 1.06E-02 | DUSP1,MAPKAPK2         |
| Sertoli Cell-Sertoli Cell Junction Signaling            | 4.86E-01 | 1.03E-02 | TUBA1A,TUBB2A          |
| Erythropoietin Signaling                                | 4.90E-01 | 1.28E-02 | SOCS3                  |
| Small Cell Lung Cancer Signaling                        | 4.90E-01 | 1.12E-02 | CCND1                  |
| IL-4 Signaling                                          | 4.90E-01 | 1.27E-02 | JAK3                   |
| ILK Signaling                                           | 4.92E-01 | 1.04E-02 | TMSB10/TMSB4X,CCND1    |
| IL-3 Signaling                                          | 5.00E-01 | 1.35E-02 | STAT3                  |
| FLT3 Signaling in Hematopoietic Progenitor Cells        | 5.00E-01 | 1.32E-02 | STAT3                  |
| Dopamine Receptor Signaling                             | 5.00E-01 | 1.06E-02 | DDC                    |
| ERK/MAPK Signaling                                      | 5.18E-01 | 9.71E-03 | DUSP1,STAT3            |
| LPS-stimulated MAPK Signaling                           | 5.20E-01 | 1.22E-02 | LBP                    |
| Salvage Pathways of Pyrimidine Ribonucleotides          | 5.30E-01 | 9.8E-03  | G6PC                   |
| Actin Cytoskeleton Signaling                            | 5.69E-01 | 8.4E-03  | TMSB10/TMSB4X,LBP      |
| IL-1 Signaling                                          | 5.79E-01 | 9.43E-03 | IL1R1                  |
| Telomerase Signaling                                    | 5.92E-01 | 9.71E-03 | CDKN1A                 |
| Amyotrophic Lateral Sclerosis Signaling                 | 6.08E-01 | 8.47E-03 | SLC1A2                 |
| Cholecystokinin/Gastrin-mediated Signaling              | 6.17E-01 | 9.43E-03 | CREM                   |
|                                                         |          |          |                        |
| <b>72 h post-TBI</b>                                    |          |          |                        |
| GADD45 Signaling                                        | 6.31E-05 | 1.36E-01 | PCNA,CDKN1A,CCND1      |
| Cell Cycle: G1/S Checkpoint Regulation                  | 1.82E-03 | 4.55E-02 | HDAC2,CDKN1A,CCND1     |
| PXR/RXR Activation                                      | 2.14E-03 | 3.45E-02 | SCD,CYP7A1,CYP2B6      |
| Nicotine Degradation II                                 | 3.16E-03 | 2.91E-02 | UGT2A3,CYP2B6,INMT     |
| Cyclins and Cell Cycle Regulation                       | 3.98E-03 | 3.37E-02 | HDAC2,CDKN1A,CCND1     |
| Estrogen-mediated S-phase Entry                         | 4.27E-03 | 7.14E-02 | CDKN1A,CCND1           |
| Flavin Biosynthesis IV (Mammalian)                      | 4.68E-03 | 1.25E-01 | RFK                    |
| p53 Signaling                                           | 5.62E-03 | 3.12E-02 | PCNA,CDKN1A,CCND1      |
| Prostate Cancer Signaling                               | 5.62E-03 | 3.06E-02 | SRD5A1,CDKN1A,CCND1    |
| Chronic Myeloid Leukemia Signaling                      | 7.76E-03 | 2.86E-02 | HDAC2,CDKN1A,CCND1     |
| Cell Cycle Regulation by BTG Family Proteins            | 9.12E-03 | 5.56E-02 | CCND1,CCRN4L           |
| Guanine and Guanosine Salvage I                         | 9.33E-03 | 1.11E-01 | HPRT1                  |
| Hereditary Breast Cancer Signaling                      | 1.29E-02 | 2.34E-02 | HDAC2,CDKN1A,CCND1     |
| Melanoma Signaling                                      | 1.58E-02 | 4.35E-02 | CDKN1A,CCND1           |
| Adenine and Adenosine Salvage III                       | 1.86E-02 | 6.67E-02 | HPRT1                  |
| Aryl Hydrocarbon Receptor Signaling                     | 2.04E-02 | 1.86E-02 | CDKN1A,CCND1,MGST3     |
| Role of CHK Proteins in Cell Cycle Checkpoint Control   | 2.14E-02 | 3.57E-02 | PCNA,CDKN1A            |
| Nicotine Degradation III                                | 2.82E-02 | 2.2E-02  | UGT2A3,CYP2B6          |
| Melatonin Degradation I                                 | 2.82E-02 | 2.41E-02 | UGT2A3,CYP2B6          |
| Oleate Biosynthesis II (Animals)                        | 4.17E-02 | 5.26E-02 | SCD                    |
| HER-2 Signaling in Breast Cancer                        | 4.47E-02 | 2.5E-02  | CDKN1A,CCND1           |

|                                                                    |          |          |                     |
|--------------------------------------------------------------------|----------|----------|---------------------|
| Guanosine Nucleotides Degradation III                              | 4.57E-02 | 4.55E-02 | NT5C3A              |
| Urate Biosynthesis/Inosine 5'-phosphate Degradation                | 5.01E-02 | 4.35E-02 | NT5C3A              |
| Adenosine Nucleotides Degradation II                               | 5.01E-02 | 4E-02    | NT5C3A              |
| Bladder Cancer Signaling                                           | 5.37E-02 | 2.2E-02  | CDKN1A,CCND1        |
| Androgen Biosynthesis                                              | 5.50E-02 | 3.85E-02 | SRD5A1              |
| Pyrimidine Deoxyribonucleotides De Novo Biosynthesis I             | 5.50E-02 | 2.78E-02 | RRM2                |
| Bile Acid Biosynthesis, Neutral Pathway                            | 5.50E-02 | 1.72E-02 | CYP7A1              |
| Methylglyoxal Degradation III                                      | 5.89E-02 | 4.35E-02 | AKR7A3              |
| LPS/IL-1 Mediated Inhibition of RXR Function                       | 6.17E-02 | 1.26E-02 | CYP7A1,CYP2B6,MGST3 |
| Glioma Signaling                                                   | 6.46E-02 | 1.79E-02 | CDKN1A,CCND1        |
| Telomerase Signaling                                               | 6.46E-02 | 1.94E-02 | HDAC2,CDKN1A        |
| Glutathione Redox Reactions I                                      | 6.76E-02 | 4.35E-02 | MGST3               |
| Mismatch Repair in Eukaryotes                                      | 7.24E-02 | 4.17E-02 | PCNA                |
| NAD Salvage Pathway II                                             | 7.24E-02 | 3.23E-02 | NT5C3A              |
| HGF Signaling                                                      | 7.24E-02 | 1.9E-02  | CDKN1A,CCND1        |
| Pancreatic Adenocarcinoma Signaling                                | 8.13E-02 | 1.67E-02 | CDKN1A,CCND1        |
| LXR/RXR Activation                                                 | 8.32E-02 | 1.47E-02 | SCD,CYP7A1          |
| DNA Methylation and Transcriptional Repression Signaling           | 8.51E-02 | 4.35E-02 | HDAC2               |
| Thyroid Hormone Metabolism II (via Conjugation and/or Degradation) | 8.91E-02 | 1.92E-02 | UGT2A3              |
| PTEN Signaling                                                     | 9.55E-02 | 1.48E-02 | CDKN1A,CCND1        |
| PI3K/AKT Signaling                                                 | 9.77E-02 | 1.39E-02 | CDKN1A,CCND1        |
| Glutathione-mediated Detoxification                                | 1.07E-01 | 2.22E-02 | MGST3               |
| Cell Cycle Control of Chromosomal Replication                      | 1.15E-01 | 3.23E-02 | RPA3                |
| Nucleotide Excision Repair Pathway                                 | 1.28E-01 | 2.86E-02 | RPA3                |
| Glioblastoma Multiforme Signaling                                  | 1.35E-01 | 1.22E-02 | CDKN1A,CCND1        |
| Circadian Rhythm Signaling                                         | 1.36E-01 | 2.7E-02  | PER2                |
| Neuroprotective Role of THOP1 in Alzheimer's Disease               | 1.36E-01 | 1.85E-02 | MME                 |
| Aldosterone Signaling in Epithelial Cells                          | 1.42E-01 | 1.19E-02 | DUSP1,HSPA4L        |
| Cell Cycle: G2/M DNA Damage Checkpoint Regulation                  | 1.64E-01 | 2.08E-02 | CDKN1A              |
| Thyroid Cancer Signaling                                           | 1.67E-01 | 2.38E-02 | CCND1               |
| Bupropion Degradation                                              | 1.72E-01 | 1.92E-02 | CYP2B6              |
| Serotonin Degradation                                              | 1.72E-01 | 1.32E-02 | UGT2A3              |
| Molecular Mechanisms of Cancer                                     | 1.73E-01 | 7.96E-03 | HAT1,CDKN1A,CCND1   |
| Acetone Degradation I (to Methylglyoxal)                           | 1.75E-01 | 1.82E-02 | CYP2B6              |
| Nur77 Signaling in T Lymphocytes                                   | 1.83E-01 | 1.59E-02 | HDAC2               |
| NRF2-mediated Oxidative Stress Response                            | 1.85E-01 | 1.04E-02 | AKR7A3,MGST3        |
| Calcium-induced T Lymphocyte Apoptosis                             | 2.13E-01 | 1.43E-02 | HDAC2               |
| Endometrial Cancer Signaling                                       | 2.13E-01 | 1.75E-02 | CCND1               |
| Estrogen Biosynthesis                                              | 2.17E-01 | 1.47E-02 | CYP2B6              |
| ErbB2-ErbB3 Signaling                                              | 2.24E-01 | 1.67E-02 | CCND1               |
| Role of BRCA1 in DNA Damage Response                               | 2.28E-01 | 1.54E-02 | CDKN1A              |
| ATM Signaling                                                      | 2.28E-01 | 1.64E-02 | CDKN1A              |
| Huntington's Disease Signaling                                     | 2.36E-01 | 8.44E-03 | HDAC2,CASP4         |

|                                                   |          |          |                       |
|---------------------------------------------------|----------|----------|-----------------------|
| Antiproliferative Role of Somatostatin Receptor 2 | 2.46E-01 | 1.41E-02 | CDKN1A                |
| GM-CSF Signaling                                  | 2.46E-01 | 1.47E-02 | CCND1                 |
| Estrogen-Dependent Breast Cancer Signaling        | 2.49E-01 | 1.39E-02 | CCND1                 |
| Non-Small Cell Lung Cancer Signaling              | 2.54E-01 | 1.27E-02 | CCND1                 |
| Small Cell Lung Cancer Signaling                  | 2.67E-01 | 1.12E-02 | CCND1                 |
| JAK/Stat Signaling                                | 2.67E-01 | 1.43E-02 | CDKN1A                |
| Acute Myeloid Leukemia Signaling                  | 2.88E-01 | 1.22E-02 | CCND1                 |
| VDR/RXR Activation                                | 2.94E-01 | 1.23E-02 | CDKN1A                |
| FXR/RXR Activation                                | 2.94E-01 | 9.9E-03  | CYP7A1                |
| TR/RXR Activation                                 | 3.01E-01 | 1.04E-02 | CYP7A1                |
| Glucocorticoid Receptor Signaling                 | 3.07E-01 | 6.8E-03  | DUSP1,CDKN1A          |
| Xenobiotic Metabolism Signaling                   | 3.07E-01 | 6.71E-03 | CYP2B6,MGST3          |
| HMGB1 Signaling                                   | 3.33E-01 | 1.01E-02 | HAT1                  |
| Sphingosine-1-phosphate Signaling                 | 3.73E-01 | 8.33E-03 | CASP4                 |
| Androgen Signaling                                | 3.79E-01 | 6.99E-03 | CCND1                 |
| p38 MAPK Signaling                                | 3.99E-01 | 8.55E-03 | DUSP1                 |
| AMPK Signaling                                    | 4.36E-01 | 6.02E-03 | PFKFB1                |
| Ovarian Cancer Signaling                          | 4.44E-01 | 7.04E-03 | CCND1                 |
| Hepatic Cholestasis                               | 4.46E-01 | 5.75E-03 | CYP7A1                |
| NF- $\kappa$ B Signaling                          | 4.93E-01 | 5.71E-03 | HDAC2                 |
| Systemic Lupus Erythematosus Signaling            | 4.97E-01 | 4.05E-03 | LSM3                  |
| Protein Kinase A Signaling                        | 4.98E-01 | 4.89E-03 | DUSP1,CDKN3           |
| Calcium Signaling                                 | 5.15E-01 | 4.74E-03 | HDAC2                 |
| Wnt/ $\beta$ -catenin Signaling                   | 5.20E-01 | 5.78E-03 | CCND1                 |
| Endothelin-1 Signaling                            | 5.26E-01 | 5.35E-03 | CASP4                 |
| RAR Activation                                    | 5.33E-01 | 5.29E-03 | DUSP1                 |
| ILK Signaling                                     | 5.37E-01 | 5.21E-03 | CCND1                 |
| Role of NFAT in Cardiac Hypertrophy               | 5.37E-01 | 4.83E-03 | HDAC2                 |
| IL-8 Signaling                                    | 5.46E-01 | 4.9E-03  | CCND1                 |
| Breast Cancer Regulation by Stathmin1             | 5.55E-01 | 4.83E-03 | CDKN1A                |
| ERK/MAPK Signaling                                | 5.55E-01 | 4.85E-03 | DUSP1                 |
| cAMP-mediated signaling                           | 6.03E-01 | 4.52E-03 | DUSP1                 |
| Phospholipase C Signaling                         | 6.17E-01 | 3.85E-03 | HDAC2                 |
|                                                   |          |          |                       |
| <b>7 days post-TBI</b>                            |          |          |                       |
| Prostate Cancer Signaling                         | 6.03E-04 | 3.06E-02 | SRD5A1,HSP90AA1,CCND1 |
| Cell Cycle Regulation by BTG Family Proteins      | 2.04E-03 | 5.56E-02 | CCND1,CCRN4L          |
| Flavin Biosynthesis IV (Mammalian)                | 2.19E-03 | 1.25E-01 | RFK                   |
| Trehalose Degradation II (Trehalase)              | 4.37E-03 | 1.25E-01 | GCK                   |
| GDP-glucose Biosynthesis                          | 1.10E-02 | 5.88E-02 | GCK                   |
| Protein Ubiquitination Pathway                    | 1.23E-02 | 1.12E-02 | UBD,HSP90AA1,DNAJB9   |
| Glucose and Glucose-1-phosphate Degradation       | 1.29E-02 | 4.55E-02 | GCK                   |
| UDP-N-acetyl-D-galactosamine Biosynthesis II      | 1.51E-02 | 4.17E-02 | GCK                   |

|                                                        |          |          |                  |
|--------------------------------------------------------|----------|----------|------------------|
| Androgen Signaling                                     | 2.04E-02 | 1.4E-02  | HSP90AA1,CCND1   |
| Hereditary Breast Cancer Signaling                     | 2.14E-02 | 1.56E-02 | UBD,CCND1        |
| PI3K/AKT Signaling                                     | 2.51E-02 | 1.39E-02 | HSP90AA1,CCND1   |
| Androgen Biosynthesis                                  | 2.57E-02 | 3.85E-02 | SRD5A1           |
| Pyrimidine Deoxyribonucleotides De Novo Biosynthesis I | 2.57E-02 | 2.78E-02 | RRM2             |
| Aryl Hydrocarbon Receptor Signaling                    | 2.95E-02 | 1.24E-02 | HSP90AA1,CCND1   |
| GADD45 Signaling                                       | 3.63E-02 | 4.55E-02 | CCND1            |
| Aldosterone Signaling in Epithelial Cells              | 3.80E-02 | 1.19E-02 | HSP90AA1,DNAJB9  |
| Maturity Onset Diabetes of Young (MODY) Signaling      | 4.07E-02 | 3.23E-02 | GCK              |
| Wnt/ $\beta$ -catenin Signaling                        | 4.47E-02 | 1.16E-02 | UBD,CCND1        |
| Estrogen-mediated S-phase Entry                        | 4.47E-02 | 3.57E-02 | CCND1            |
| NRF2-mediated Oxidative Stress Response                | 5.13E-02 | 1.04E-02 | HERPUD1,DNAJB9   |
| Neuroprotective Role of THOP1 in Alzheimer's Disease   | 6.61E-02 | 1.85E-02 | MME              |
| Dermatan Sulfate Biosynthesis (Late Stages)            | 7.41E-02 | 2.13E-02 | SULT2A1          |
| Chondroitin Sulfate Biosynthesis (Late Stages)         | 7.94E-02 | 1.85E-02 | SULT2A1          |
| Thyroid Cancer Signaling                               | 8.13E-02 | 2.38E-02 | CCND1            |
| Melanoma Signaling                                     | 8.51E-02 | 2.17E-02 | CCND1            |
| Heparan Sulfate Biosynthesis (Late Stages)             | 8.71E-02 | 1.64E-02 | SULT2A1          |
| Xenobiotic Metabolism Signaling                        | 9.55E-02 | 6.71E-03 | HSP90AA1,SULT2A1 |
| GABA Receptor Signaling                                | 9.55E-02 | 1.75E-02 | UBD              |
| Endometrial Cancer Signaling                           | 1.06E-01 | 1.75E-02 | CCND1            |
| Cell Cycle: G1/S Checkpoint Regulation                 | 1.08E-01 | 1.52E-02 | CCND1            |
| ErbB2-ErbB3 Signaling                                  | 1.11E-01 | 1.67E-02 | CCND1            |
| PXR/RXR Activation                                     | 1.14E-01 | 1.15E-02 | SULT2A1          |
| Hypoxia Signaling in the Cardiovascular System         | 1.17E-01 | 1.52E-02 | HSP90AA1         |
| Mitotic Roles of Polo-Like Kinase                      | 1.23E-01 | 1.45E-02 | HSP90AA1         |
| GM-CSF Signaling                                       | 1.23E-01 | 1.47E-02 | CCND1            |
| Estrogen-Dependent Breast Cancer Signaling             | 1.25E-01 | 1.39E-02 | CCND1            |
| Non-Small Cell Lung Cancer Signaling                   | 1.27E-01 | 1.27E-02 | CCND1            |
| Renal Cell Carcinoma Signaling                         | 1.35E-01 | 1.35E-02 | UBD              |
| Small Cell Lung Cancer Signaling                       | 1.35E-01 | 1.12E-02 | CCND1            |
| Nitric Oxide Signaling in the Cardiovascular System    | 1.36E-01 | 1.01E-02 | HSP90AA1         |
| Cyclins and Cell Cycle Regulation                      | 1.38E-01 | 1.12E-02 | CCND1            |
| Acute Myeloid Leukemia Signaling                       | 1.46E-01 | 1.22E-02 | CCND1            |
| HER-2 Signaling in Breast Cancer                       | 1.46E-01 | 1.25E-02 | CCND1            |
| VDR/RXR Activation                                     | 1.50E-01 | 1.23E-02 | SULT2A1          |
| FXR/RXR Activation                                     | 1.50E-01 | 9.9E-03  | SULT2A1          |
| TR/RXR Activation                                      | 1.53E-01 | 1.04E-02 | NRGN             |
| p53 Signaling                                          | 1.55E-01 | 1.04E-02 | CCND1            |
| Bladder Cancer Signaling                               | 1.61E-01 | 1.1E-02  | CCND1            |
| Neuregulin Signaling                                   | 1.64E-01 | 9.8E-03  | HSP90AA1         |
| Chronic Myeloid Leukemia Signaling                     | 1.74E-01 | 9.52E-03 | CCND1            |
| Glioma Signaling                                       | 1.75E-01 | 8.93E-03 | CCND1            |



|                                                                                |          |          |          |
|--------------------------------------------------------------------------------|----------|----------|----------|
| Telomerase Signaling                                                           | 1.75E-01 | 9.71E-03 | HSP90AA1 |
| PPAR Signaling                                                                 | 1.79E-01 | 9.52E-03 | HSP90AA1 |
| HGF Signaling                                                                  | 1.88E-01 | 9.52E-03 | CCND1    |
| HIF1 $\alpha$ Signaling                                                        | 1.90E-01 | 9.26E-03 | HSP90AA1 |
| Pancreatic Adenocarcinoma Signaling                                            | 1.99E-01 | 8.33E-03 | CCND1    |
| PTEN Signaling                                                                 | 2.16E-01 | 7.41E-03 | CCND1    |
| Type II Diabetes Mellitus Signaling                                            | 2.18E-01 | 6.21E-03 | GCK      |
| eNOS Signaling                                                                 | 2.23E-01 | 6.58E-03 | HSP90AA1 |
| Ovarian Cancer Signaling                                                       | 2.38E-01 | 7.04E-03 | CCND1    |
| Glioblastoma Multiforme Signaling                                              | 2.60E-01 | 6.1E-03  | CCND1    |
| PPAR $\alpha$ /RXR $\alpha$ Activation                                         | 2.86E-01 | 5.43E-03 | HSP90AA1 |
| ILK Signaling                                                                  | 3.01E-01 | 5.21E-03 | CCND1    |
| Clathrin-mediated Endocytosis Signaling                                        | 3.04E-01 | 5.1E-03  | UBD      |
| IL-8 Signaling                                                                 | 3.08E-01 | 4.9E-03  | CCND1    |
| LPS/IL-1 Mediated Inhibition of RXR Function                                   | 3.45E-01 | 4.18E-03 | SULT2A1  |
| Huntington's Disease Signaling                                                 | 3.52E-01 | 4.22E-03 | UBD      |
| Colorectal Cancer Metastasis Signaling                                         | 3.78E-01 | 3.89E-03 | CCND1    |
| Glucocorticoid Receptor Signaling                                              | 4.08E-01 | 3.4E-03  | HSP90AA1 |
| Role of Macrophages, Fibroblasts and Endothelial Cells in Rheumatoid Arthritis | 4.51E-01 | 3E-03    | CCND1    |
| Molecular Mechanisms of Cancer                                                 | 4.92E-01 | 2.65E-03 | CCND1    |
| Protein Kinase A Signaling                                                     | 5.43E-01 | 2.44E-03 | CDKN3    |
