# Supplementary material
Source: PubMed Central journal article supplement (PMC4540723)
Supplement: 12248_2015_9792_MOESM4_ESM.pdf [file 12248_2015_9792_MOESM4_ESM.pdf]

| <b>Supplementary Table 3: Ingenuity Canonical Pathways: EPO Sham Contrast</b>                 |                |              |                                     |
|-----------------------------------------------------------------------------------------------|----------------|--------------|-------------------------------------|
| <b>Canonical Pathways</b>                                                                     | <b>p-value</b> | <b>Ratio</b> | <b>Genes</b>                        |
| <b>24 h post-TBI</b>                                                                          |                |              |                                     |
| Circadian Rhythm Signaling                                                                    | 9.55E-05       | 8.11E-02     | PER3,ARNTL,CRY1                     |
| IL-17A Signaling in Fibroblasts                                                               | 4.07E-03       | 5E-02        | JUN,LCN2                            |
| IL-6 Signaling                                                                                | 4.17E-03       | 2.42E-02     | IL18 (includes EG:16173),JUN,A2M    |
| IL-12 Signaling and Production in Macrophages                                                 | 4.27E-03       | 1.92E-02     | ALOX15,IL18 (includes EG:16173),JUN |
| Glucocorticoid Receptor Signaling                                                             | 4.90E-03       | 1.36E-02     | JUN,DUSP1,CDKN1A,A2M                |
| Acute Phase Response Signaling                                                                | 1.05E-02       | 1.69E-02     | IL18 (includes EG:16173),JUN,A2M    |
| Eicosanoid Signaling                                                                          | 1.07E-02       | 2.5E-02      | ALOX15,LTC4S                        |
| ATM Signaling                                                                                 | 1.12E-02       | 3.28E-02     | JUN,CDKN1A                          |
| RAR Activation                                                                                | 1.12E-02       | 1.59E-02     | CSF2RB,JUN,DUSP1                    |
| IL-10 Signaling                                                                               | 1.58E-02       | 2.56E-02     | IL18 (includes EG:16173),JUN        |
| Crosstalk between Dendritic Cells and Natural Killer Cells                                    | 1.62E-02       | 2.11E-02     | CSF2RB,IL18 (includes EG:16173)     |
| IL-3 Signaling                                                                                | 1.66E-02       | 2.7E-02      | CSF2RB,JUN                          |
| Leukotriene Biosynthesis                                                                      | 2.57E-02       | 4E-02        | LTC4S                               |
| PPAR Signaling                                                                                | 2.82E-02       | 1.9E-02      | IL18 (includes EG:16173),JUN        |
| Guanosine Nucleotides Degradation III                                                         | 2.88E-02       | 4.55E-02     | NT5C3                               |
| Cholecystokinin/Gastrin-mediated Signaling                                                    | 3.02E-02       | 1.89E-02     | IL18 (includes EG:16173),JUN        |
| HGF Signaling                                                                                 | 3.09E-02       | 1.9E-02      | JUN,CDKN1A                          |
| Urate Biosynthesis/Inosine 5'-phosphate Degradation                                           | 3.16E-02       | 4.35E-02     | NT5C3                               |
| Adenosine Nucleotides Degradation II                                                          | 3.16E-02       | 4E-02        | NT5C3                               |
| p38 MAPK Signaling                                                                            | 3.89E-02       | 1.71E-02     | IL18 (includes EG:16173),DUSP1      |
| NAD Salvage Pathway II                                                                        | 4.57E-02       | 3.23E-02     | NT5C3                               |
| GNRH Signaling                                                                                | 4.57E-02       | 1.36E-02     | JUN,EGR1                            |
| GADD45 Signaling                                                                              | 4.79E-02       | 4.55E-02     | CDKN1A                              |
| Aryl Hydrocarbon Receptor Signaling                                                           | 5.01E-02       | 1.24E-02     | JUN,CDKN1A                          |
| Differential Regulation of Cytokine Production in Intestinal Epithelial Cells by IL-17A and I | 5.37E-02       | 4.35E-02     | LCN2                                |
| Estrogen-mediated S-phase Entry                                                               | 5.89E-02       | 3.57E-02     | CDKN1A                              |
| CXCR4 Signaling                                                                               | 6.17E-02       | 1.2E-02      | JUN,EGR1                            |
| B Cell Receptor Signaling                                                                     | 6.61E-02       | 1.21E-02     | JUN,EGR1                            |
| IL-17A Signaling in Gastric Cells                                                             | 6.76E-02       | 4E-02        | JUN                                 |
| PPARα/RXRα Activation                                                                         | 7.24E-02       | 1.09E-02     | Cyp2c40 (includes others),JUN       |
| TNFR2 Signaling                                                                               | 7.24E-02       | 3.03E-02     | JUN                                 |
| Cell Cycle Control of Chromosomal Replication                                                 | 7.24E-02       | 3.23E-02     | RPA3                                |
| Sertoli Cell-Sertoli Cell Junction Signaling                                                  | 7.94E-02       | 1.03E-02     | JUN,A2M                             |
| 4-1BB Signaling in T Lymphocytes                                                              | 8.13E-02       | 2.78E-02     | JUN                                 |
| Nucleotide Excision Repair Pathway                                                            | 8.13E-02       | 2.86E-02     | RPA3                                |
| Coagulation System                                                                            | 9.55E-02       | 2.63E-02     | A2M                                 |
| Role of Cytokines in Mediating Communication between Immune Cells                             | 1.00E-01       | 1.82E-02     | IL18 (includes EG:16173)            |
| Docosahexaenoic Acid (DHA) Signaling                                                          | 1.00E-01       | 2.04E-02     | ALOX15                              |
| April Mediated Signaling                                                                      | 1.00E-01       | 2.33E-02     | JUN                                 |

|                                                                      |          |          |                           |
|----------------------------------------------------------------------|----------|----------|---------------------------|
| MIF Regulation of Innate Immunity                                    | 1.05E-01 | 2E-02    | JUN                       |
| B Cell Activating Factor Signaling                                   | 1.05E-01 | 2.22E-02 | JUN                       |
| Cell Cycle: G2/M DNA Damage Checkpoint Regulation                    | 1.05E-01 | 2.08E-02 | CDKN1A                    |
| Bupropion Degradation                                                | 1.10E-01 | 1.92E-02 | Cyp2c40 (includes others) |
| MSP-RON Signaling Pathway                                            | 1.13E-01 | 2E-02    | CSF2RB                    |
| iNOS Signaling                                                       | 1.13E-01 | 1.89E-02 | JUN                       |
| Acetone Degradation I (to Methylglyoxal)                             | 1.13E-01 | 1.82E-02 | Cyp2c40 (includes others) |
| TNFR1 Signaling                                                      | 1.23E-01 | 1.92E-02 | JUN                       |
| EGF Signaling                                                        | 1.23E-01 | 1.92E-02 | JUN                       |
| Role of CHK Proteins in Cell Cycle Checkpoint Control                | 1.31E-01 | 1.79E-02 | CDKN1A                    |
| Activation of IRF by Cytosolic Pattern Recognition Receptors         | 1.33E-01 | 1.39E-02 | JUN                       |
| CD27 Signaling in Lymphocytes                                        | 1.33E-01 | 1.75E-02 | JUN                       |
| TREM1 Signaling                                                      | 1.38E-01 | 1.41E-02 | IL18 (includes EG:16173)  |
| OX40 Signaling Pathway                                               | 1.38E-01 | 1.06E-02 | JUN                       |
| IL-2 Signaling                                                       | 1.38E-01 | 1.72E-02 | JUN                       |
| Estrogen Biosynthesis                                                | 1.41E-01 | 1.47E-02 | Cyp2c40 (includes others) |
| Cell Cycle: G1/S Checkpoint Regulation                               | 1.41E-01 | 1.52E-02 | CDKN1A                    |
| Thrombopoietin Signaling                                             | 1.46E-01 | 1.59E-02 | JUN                       |
| ErbB2-ErbB3 Signaling                                                | 1.46E-01 | 1.67E-02 | JUN                       |
| Nicotine Degradation III                                             | 1.51E-01 | 1.1E-02  | Cyp2c40 (includes others) |
| Melatonin Degradation I                                              | 1.51E-01 | 1.2E-02  | Cyp2c40 (includes others) |
| CD40 Signaling                                                       | 1.56E-01 | 1.43E-02 | JUN                       |
| CCR5 Signaling in Macrophages                                        | 1.58E-01 | 1.06E-02 | JUN                       |
| Agrin Interactions at Neuromuscular Junction                         | 1.58E-01 | 1.45E-02 | JUN                       |
| T Helper Cell Differentiation                                        | 1.61E-01 | 1.39E-02 | IL18 (includes EG:16173)  |
| Antiproliferative Role of Somatostatin Receptor 2                    | 1.61E-01 | 1.41E-02 | CDKN1A                    |
| GM-CSF Signaling                                                     | 1.61E-01 | 1.47E-02 | CSF2RB                    |
| Communication between Innate and Adaptive Immune Cells               | 1.63E-01 | 9.17E-03 | IL18 (includes EG:16173)  |
| Nicotine Degradation II                                              | 1.68E-01 | 9.71E-03 | Cyp2c40 (includes others) |
| Chemokine Signaling                                                  | 1.71E-01 | 1.37E-02 | JUN                       |
| Neurotrophin/TRK Signaling                                           | 1.71E-01 | 1.33E-02 | JUN                       |
| Growth Hormone Signaling                                             | 1.73E-01 | 1.32E-02 | A2M                       |
| Erythropoietin Signaling                                             | 1.75E-01 | 1.28E-02 | JUN                       |
| JAK/Stat Signaling                                                   | 1.75E-01 | 1.43E-02 | CDKN1A                    |
| GDNF Family Ligand-Receptor Interactions                             | 1.78E-01 | 1.37E-02 | JUN                       |
| Cyclins and Cell Cycle Regulation                                    | 1.80E-01 | 1.12E-02 | CDKN1A                    |
| BMP signaling pathway                                                | 1.80E-01 | 1.25E-02 | JUN                       |
| Prolactin Signaling                                                  | 1.90E-01 | 1.25E-02 | JUN                       |
| VDR/RXR Activation                                                   | 1.95E-01 | 1.23E-02 | CDKN1A                    |
| FXR/RXR Activation                                                   | 1.95E-01 | 9.9E-03  | IL18 (includes EG:16173)  |
| PDGF Signaling                                                       | 1.97E-01 | 1.18E-02 | JUN                       |
| Ceramide Signaling                                                   | 1.99E-01 | 1.14E-02 | JUN                       |
| Regulation of IL-2 Expression in Activated and Anergic T Lymphocytes | 2.01E-01 | 1.12E-02 | JUN                       |

|                                                                       |          |          |                                          |
|-----------------------------------------------------------------------|----------|----------|------------------------------------------|
| CDK5 Signaling                                                        | 2.04E-01 | 1.06E-02 | EGR1                                     |
| TGF- $\beta$ Signaling                                                | 2.11E-01 | 1.12E-02 | JUN                                      |
| ErbB Signaling                                                        | 2.15E-01 | 1.15E-02 | JUN                                      |
| FGF Signaling                                                         | 2.15E-01 | 1.09E-02 | FGF23                                    |
| IL-1 Signaling                                                        | 2.20E-01 | 9.43E-03 | JUN                                      |
| HMGB1 Signaling                                                       | 2.22E-01 | 1.01E-02 | JUN                                      |
| SAPK/JNK Signaling                                                    | 2.22E-01 | 9.8E-03  | JUN                                      |
| IGF-1 Signaling                                                       | 2.34E-01 | 9.52E-03 | JUN                                      |
| T Cell Receptor Signaling                                             | 2.38E-01 | 9.17E-03 | JUN                                      |
| Rac Signaling                                                         | 2.43E-01 | 8.2E-03  | JUN                                      |
| Androgen Signaling                                                    | 2.56E-01 | 6.99E-03 | JUN                                      |
| LXR/RXR Activation                                                    | 2.58E-01 | 7.35E-03 | IL18 (includes EG:16173)                 |
| 14-3-3-mediated Signaling                                             | 2.62E-01 | 8.55E-03 | JUN                                      |
| CD28 Signaling in T Helper Cells                                      | 2.62E-01 | 7.58E-03 | JUN                                      |
| Corticotropin Releasing Hormone Signaling                             | 2.62E-01 | 7.35E-03 | JUN                                      |
| PKC $\theta$ Signaling in T Lymphocytes                               | 2.62E-01 | 6.99E-03 | JUN                                      |
| G $\alpha$ 12/13 Signaling                                            | 2.71E-01 | 7.94E-03 | JUN                                      |
| Cdc42 Signaling                                                       | 2.88E-01 | 5.65E-03 | JUN                                      |
| PI3K Signaling in B Lymphocytes                                       | 3.01E-01 | 7.14E-03 | JUN                                      |
| Relaxin Signaling                                                     | 3.05E-01 | 6.33E-03 | JUN                                      |
| Tight Junction Signaling                                              | 3.37E-01 | 6.21E-03 | JUN                                      |
| Germ Cell-Sertoli Cell Junction Signaling                             | 3.40E-01 | 6.1E-03  | A2M                                      |
| NF- $\kappa$ B Signaling                                              | 3.44E-01 | 5.71E-03 | IL18 (includes EG:16173)                 |
| Role of NFAT in Regulation of the Immune Response                     | 3.54E-01 | 5.08E-03 | JUN                                      |
| ILK Signaling                                                         | 3.80E-01 | 5.21E-03 | JUN                                      |
| Production of Nitric Oxide and Reactive Oxygen Species in Macrophages | 3.82E-01 | 4.76E-03 | JUN                                      |
| G-Protein Coupled Receptor Signaling                                  | 3.87E-01 | 3.8E-03  | TACR1,DUSP1                              |
| NRF2-mediated Oxidative Stress Response                               | 3.87E-01 | 5.21E-03 | JUN                                      |
| IL-8 Signaling                                                        | 3.87E-01 | 4.9E-03  | JUN                                      |
| Leukocyte Extravasation Signaling                                     | 3.96E-01 | 5.08E-03 | MMP8                                     |
| Actin Cytoskeleton Signaling                                          | 4.25E-01 | 4.2E-03  | FGF23                                    |
| cAMP-mediated signaling                                               | 4.37E-01 | 4.52E-03 | DUSP1                                    |
| Signaling by Rho Family GTPases                                       | 4.51E-01 | 3.97E-03 | JUN                                      |
| <b>72 h post-TBI</b>                                                  |          |          |                                          |
| Eicosanoid Signaling                                                  | 1.62E-03 | 6.25E-02 | ALOX15,PLA2G4A,PLA2G2A,HPGDS,DPEP2       |
| Fc Epsilon RI Signaling                                               | 5.50E-03 | 5.13E-02 | PLA2G4A,RAC2,GRAP2,FCER1G,MAP2K3,PLA2G2A |
| Phospholipases                                                        | 8.71E-03 | 6.06E-02 | HMOX1,PLA2G4A,PLA2G2A,PLA1A              |
| Pyrimidine Deoxyribonucleotides De Novo Biosynthesis I                | 1.51E-02 | 5.56E-02 | CMPK2,RRM2                               |
| Oncostatin M Signaling                                                | 1.51E-02 | 8.57E-02 | TIMP3,OSMR,CHI3L1                        |
| Asparagine Biosynthesis I                                             | 1.58E-02 | 1.25E-01 | ASNS                                     |
| Cell Cycle: G2/M DNA Damage Checkpoint Regulation                     | 2.24E-02 | 6.25E-02 | CDC25B,GADD45A,TOP2A                     |
| p38 MAPK Signaling                                                    | 2.88E-02 | 4.27E-02 | CDC25B,PLA2G4A,RPS6KA3,MAP2K3,PLA2G2A    |

|                                                             |          |          |                                                  |
|-------------------------------------------------------------|----------|----------|--------------------------------------------------|
| GADD45 Signaling                                            | 2.95E-02 | 9.09E-02 | PCNA,GADD45A                                     |
| Trehalose Degradation II (Trehalase)                        | 3.16E-02 | 1.25E-01 | GCK                                              |
| B Cell Development                                          | 3.98E-02 | 6.06E-02 | IL7R,PTPRC                                       |
| Melatonin Degradation II                                    | 4.68E-02 | 8.33E-02 | SMOX                                             |
| Arginine Degradation I (Arginase Pathway)                   | 4.68E-02 | 7.69E-02 | OAT                                              |
| Rapoport-Luebering Glycolytic Shunt                         | 4.68E-02 | 1E-01    | BPGM                                             |
| NAD Biosynthesis III                                        | 4.68E-02 | 1E-01    | NAMPT                                            |
| Gluconeogenesis I                                           | 4.68E-02 | 4E-02    | ME2,BPGM                                         |
| Leukocyte Extravasation Signaling                           | 5.75E-02 | 3.05E-02 | ITGB2,RAC2,TIMP3,MMP8,CYBB,SELPLG                |
| Natural Killer Cell Signaling                               | 5.89E-02 | 3.45E-02 | RAC2,CD244,FCER1G,SH2D1B                         |
| D-myo-inositol (1,4,5)-Trisphosphate Biosynthesis           | 5.89E-02 | 5.26E-02 | PIP5K1B,PIP4K2A                                  |
| Heme Degradation                                            | 6.17E-02 | 9.09E-02 | HMOX1                                            |
| Heme Biosynthesis from Uroporphyrinogen-III I               | 6.17E-02 | 9.09E-02 | FECH                                             |
| Tetrapyrrole Biosynthesis II                                | 6.17E-02 | 7.69E-02 | ALAS2                                            |
| Spermine and Spermidine Degradation I                       | 6.17E-02 | 7.14E-02 | SMOX                                             |
| Rac Signaling                                               | 6.46E-02 | 3.28E-02 | CYBB,PIP5K1B,PIP4K2A,ANK1                        |
| Arginine Biosynthesis IV                                    | 7.76E-02 | 4.17E-02 | OAT                                              |
| Proline Biosynthesis II (from Arginine)                     | 7.76E-02 | 5E-02    | OAT                                              |
| Tetrahydrofolate Salvage from 5,10-methenyltetrahydrofolate | 7.76E-02 | 9.09E-02 | MTHFD2                                           |
| Ceramide Degradation                                        | 7.76E-02 | 7.14E-02 | ACER2                                            |
| GDP-glucose Biosynthesis                                    | 7.76E-02 | 5.88E-02 | GCK                                              |
| MIF-mediated Glucocorticoid Regulation                      | 8.13E-02 | 4.76E-02 | PLA2G4A,PLA2G2A                                  |
| Macropinocytosis Signaling                                  | 8.51E-02 | 3.95E-02 | MRC1 (includes EG:100286774),ITGB2,HGF           |
| Glucose and Glucose-1-phosphate Degradation                 | 9.12E-02 | 4.55E-02 | GCK                                              |
| Arginine Degradation VI (Arginase 2 Pathway)                | 9.12E-02 | 6.25E-02 | OAT                                              |
| Regulation of Actin-based Motility by Rho                   | 1.00E-01 | 3.37E-02 | RAC2,PIP5K1B,PIP4K2A                             |
| Coagulation System                                          | 1.02E-01 | 5.26E-02 | F2R,F13A1                                        |
| Phospholipase C Signaling                                   | 1.04E-01 | 2.31E-02 | HMOX1,PLA2G4A,GRAP2,RPS6KA3,FCER1G,PLA2G2A       |
| Sphingosine and Sphingosine-1-phosphate Metabolism          | 1.06E-01 | 4.76E-02 | ACER2                                            |
| Histidine Degradation III                                   | 1.06E-01 | 5.26E-02 | MTHFD2                                           |
| UDP-N-acetyl-D-galactosamine Biosynthesis II                | 1.06E-01 | 4.17E-02 | GCK                                              |
| VDR/RXR Activation                                          | 1.14E-01 | 3.7E-02  | GADD45A,MXD1,IGFBP1                              |
| Sertoli Cell-Sertoli Cell Junction Signaling                | 1.15E-01 | 2.56E-02 | EPB41,SPTB,CSDA (includes EG:56449),SPTA1,MAP2K3 |
| Citrulline Biosynthesis                                     | 1.21E-01 | 3.85E-02 | OAT                                              |
| MIF Regulation of Innate Immunity                           | 1.22E-01 | 4E-02    | PLA2G4A,PLA2G2A                                  |
| CTLA4 Signaling in Cytotoxic T Lymphocytes                  | 1.24E-01 | 3.06E-02 | GRAP2,AP1S2,FCER1G                               |
| IL-8 Signaling                                              | 1.28E-01 | 2.45E-02 | ITGB2,HMOX1,RAC2,CXCR2,CYBB                      |
| Prostanoid Biosynthesis                                     | 1.35E-01 | 6.25E-02 | HPGDS                                            |
| Leukotriene Biosynthesis                                    | 1.35E-01 | 4E-02    | DPEP2                                            |
| Folate Transformations I                                    | 1.35E-01 | 3.03E-02 | MTHFD2                                           |
| MSP-RON Signaling Pathway                                   | 1.38E-01 | 4E-02    | CSF2RB,ITGB2                                     |
| FGF Signaling                                               | 1.46E-01 | 3.26E-02 | HGF,FGF23,MAP2K3                                 |
| Guanosine Nucleotides Degradation III                       | 1.48E-01 | 4.55E-02 | GDA                                              |

|                                                                                               |          |          |                                  |
|-----------------------------------------------------------------------------------------------|----------|----------|----------------------------------|
| SAPK/JNK Signaling                                                                            | 1.57E-01 | 2.94E-02 | RAC2,GADD45A,FCER1G              |
| Fcy Receptor-mediated Phagocytosis in Macrophages and Monocytes                               | 1.61E-01 | 2.94E-02 | HMOX1,RAC2,FYB                   |
| 3-phosphoinositide Biosynthesis                                                               | 1.72E-01 | 2.82E-02 | PIP5K1B,PIP4K2A                  |
| Lipid Antigen Presentation by CD1                                                             | 1.75E-01 | 4.35E-02 | FCER1G                           |
| Actin Cytoskeleton Signaling                                                                  | 1.81E-01 | 2.1E-02  | RAC2,F2R,FGF23,PIP5K1B,PIP4K2A   |
| iCOS-iCOSL Signaling in T Helper Cells                                                        | 1.85E-01 | 2.44E-02 | PTPRC,GRAP2,FCER1G               |
| Choline Biosynthesis III                                                                      | 1.88E-01 | 4.55E-02 | HMOX1                            |
| Phenylalanine Degradation IV (Mammalian, via Side Chain)                                      | 1.88E-01 | 2.56E-02 | SMOX                             |
| Granzyme A Signaling                                                                          | 2.01E-01 | 5E-02    | GZMA                             |
| Tryptophan Degradation X (Mammalian, via Tryptamine)                                          | 2.01E-01 | 3.45E-02 | SMOX                             |
| Putrescine Degradation III                                                                    | 2.01E-01 | 3.33E-02 | SMOX                             |
| RhoA Signaling                                                                                | 2.09E-01 | 2.63E-02 | SEPT5,PIP5K1B,PIP4K2A            |
| Signaling by Rho Family GTPases                                                               | 2.26E-01 | 1.98E-02 | SEPT5,CDH17,CYBB,PIP5K1B,PIP4K2A |
| Extrinsic Prothrombin Activation Pathway                                                      | 2.26E-01 | 5E-02    | F13A1                            |
| Mismatch Repair in Eukaryotes                                                                 | 2.26E-01 | 4.17E-02 | PCNA                             |
| CD28 Signaling in T Helper Cells                                                              | 2.30E-01 | 2.27E-02 | PTPRC,GRAP2,FCER1G               |
| PKC $\theta$ Signaling in T Lymphocytes                                                       | 2.30E-01 | 2.1E-02  | RAC2,GRAP2,FCER1G                |
| Pyridoxal 5'-phosphate Salvage Pathway                                                        | 2.36E-01 | 2.78E-02 | PIM1 (includes EG:18712),MAP2K3  |
| Aggrin Interactions at Neuromuscular Junction                                                 | 2.42E-01 | 2.9E-02  | ITGB2,RAC2                       |
| G $\alpha$ 12/13 Signaling                                                                    | 2.47E-01 | 2.38E-02 | F2RL2,F2R,CDH17                  |
| Mitotic Roles of Polo-Like Kinase                                                             | 2.48E-01 | 2.9E-02  | CDC25B,PTTG1                     |
| GM-CSF Signaling                                                                              | 2.48E-01 | 2.94E-02 | CSF2RB,PIM1 (includes EG:18712)  |
| Dopamine Degradation                                                                          | 2.51E-01 | 2.7E-02  | SMOX                             |
| Differential Regulation of Cytokine Production in Intestinal Epithelial Cells by IL-17A and I | 2.63E-01 | 4.35E-02 | LCN2                             |
| Pyrimidine Ribonucleotides Interconversion                                                    | 2.75E-01 | 2.78E-02 | CMPK2                            |
| NRF2-mediated Oxidative Stress Response                                                       | 2.76E-01 | 2.08E-02 | HMOX1,MAP2K3,JUNB,ENC1           |
| IL-10 Signaling                                                                               | 2.83E-01 | 2.56E-02 | HMOX1,MAP2K3                     |
| Glycolysis I                                                                                  | 2.86E-01 | 2.22E-02 | BPGM                             |
| Crosstalk between Dendritic Cells and Natural Killer Cells                                    | 2.89E-01 | 2.11E-02 | CSF2RB,CD226                     |
| VEGF Family Ligand-Receptor Interactions                                                      | 3.07E-01 | 2.38E-02 | PLA2G4A,PLA2G2A                  |
| Tumoricidal Function of Hepatic Natural Killer Cells                                          | 3.09E-01 | 4.17E-02 | SRGN                             |
| Glutathione-mediated Detoxification                                                           | 3.20E-01 | 2.22E-02 | HPGDS                            |
| Salvage Pathways of Pyrimidine Ribonucleotides                                                | 3.30E-01 | 1.96E-02 | PIM1 (includes EG:18712),MAP2K3  |
| Antiproliferative Role of TOB in T Cell Signaling                                             | 3.31E-01 | 3.85E-02 | PABPC1                           |
| Role of JAK family kinases in IL-6-type Cytokine Signaling                                    | 3.31E-01 | 3.7E-02  | OSMR                             |
| Intrinsic Prothrombin Activation Pathway                                                      | 3.41E-01 | 2.86E-02 | F13A1                            |
| Hematopoiesis from Pluripotent Stem Cells                                                     | 3.41E-01 | 1.59E-02 | FCER1G                           |
| Noradrenaline and Adrenaline Degradation                                                      | 3.41E-01 | 1.92E-02 | SMOX                             |
| TR/RXR Activation                                                                             | 3.42E-01 | 2.08E-02 | UCP2,NCOA4                       |
| Complement System                                                                             | 3.52E-01 | 2.86E-02 | CD55                             |
| Interferon Signaling                                                                          | 3.62E-01 | 2.78E-02 | MX1                              |
| Serotonin Receptor Signaling                                                                  | 3.62E-01 | 2.17E-02 | SMOX                             |
| Retinoate Biosynthesis I                                                                      | 3.72E-01 | 2.63E-02 | Rdh1 (includes others)           |

|                                                           |          |          |                                      |
|-----------------------------------------------------------|----------|----------|--------------------------------------|
| Tight Junction Signaling                                  | 3.86E-01 | 1.86E-02 | EPB41,F2RL2,CSDA (includes EG:56449) |
| Circadian Rhythm Signaling                                | 3.93E-01 | 2.7E-02  | PER1                                 |
| Inhibition of Angiogenesis by TSP1                        | 3.93E-01 | 2.56E-02 | CD36                                 |
| B Cell Receptor Signaling                                 | 4.07E-01 | 1.82E-02 | PTPRC,RAC2,MAP2K3                    |
| IL-17A Signaling in Fibroblasts                           | 4.11E-01 | 2.5E-02  | LCN2                                 |
| RhoGDI Signaling                                          | 4.33E-01 | 1.52E-02 | CDH17,PIP5K1B,PIP4K2A                |
| T Cell Receptor Signaling                                 | 4.38E-01 | 1.83E-02 | PTPRC,GRAP2                          |
| Docosahexaenoic Acid (DHA) Signaling                      | 4.40E-01 | 2.04E-02 | ALOX15                               |
| Netrin Signaling                                          | 4.40E-01 | 1.75E-02 | RAC2                                 |
| PPAR $\alpha$ /RXR $\alpha$ Activation                    | 4.42E-01 | 1.63E-02 | CD36,MAP2K3,ADIPOR1                  |
| Acute Phase Response Signaling                            | 4.54E-01 | 1.69E-02 | HMOX1,OSMR,MAP2K3                    |
| D-myo-inositol-5-phosphate Metabolism                     | 4.57E-01 | 1.92E-02 | PIP4K2A                              |
| Endothelin-1 Signaling                                    | 4.62E-01 | 1.6E-02  | HMOX1,PLA2G4A,PLA2G2A                |
| Serotonin Degradation                                     | 4.74E-01 | 1.32E-02 | SMOX                                 |
| LXR/RXR Activation                                        | 4.85E-01 | 1.47E-02 | CD36,S100A8                          |
| CCR3 Signaling in Eosinophils                             | 4.95E-01 | 1.59E-02 | PLA2G4A,PLA2G2A                      |
| Nur77 Signaling in T Lymphocytes                          | 4.99E-01 | 1.59E-02 | FCER1G                               |
| CNTF Signaling                                            | 5.22E-01 | 1.82E-02 | RPS6KA3                              |
| Integrin Signaling                                        | 5.30E-01 | 1.45E-02 | ITGB2,RAC2,PARVB                     |
| Cytotoxic T Lymphocyte-mediated Apoptosis of Target Cells | 5.31E-01 | 1.18E-02 | FCER1G                               |
| Role of CHK Proteins in Cell Cycle Checkpoint Control     | 5.38E-01 | 1.79E-02 | PCNA                                 |
| IL-12 Signaling and Production in Macrophages             | 5.40E-01 | 1.28E-02 | ALOX15,S100A8                        |
| p70S6K Signaling                                          | 5.40E-01 | 1.55E-02 | F2RL2,F2R                            |
| CD27 Signaling in Lymphocytes                             | 5.46E-01 | 1.75E-02 | MAP2K3                               |
| Calcium-induced T Lymphocyte Apoptosis                    | 5.60E-01 | 1.43E-02 | FCER1G                               |
| OX40 Signaling Pathway                                    | 5.60E-01 | 1.06E-02 | FCER1G                               |
| PXR/RXR Activation                                        | 5.87E-01 | 1.15E-02 | IGFBP1                               |
| ATM Signaling                                             | 5.87E-01 | 1.64E-02 | GADD45A                              |
| Role of JAK1 and JAK3 in $\gamma$ c Cytokine Signaling    | 6.00E-01 | 1.49E-02 | IL7R                                 |
| CD40 Signaling                                            | 6.07E-01 | 1.43E-02 | MAP2K3                               |
| ERK5 Signaling                                            | 6.07E-01 | 1.54E-02 | RPS6KA3                              |
| CCR5 Signaling in Macrophages                             | 6.12E-01 | 1.06E-02 | FCER1G                               |
| T Helper Cell Differentiation                             | 6.19E-01 | 1.39E-02 | FCER1G                               |
| Communication between Innate and Adaptive Immune Cells    | 6.25E-01 | 9.17E-03 | FCER1G                               |
|                                                           |          |          |                                      |
| <b>7 days post-TBI</b>                                    |          |          |                                      |
| Histidine Degradation III                                 | 1.10E-03 | 1.05E-01 | MTHFD2,AMDHD1                        |
| Pyrimidine Deoxyribonucleotides De Novo Biosynthesis I    | 3.39E-03 | 5.56E-02 | CMPK2,EHD4                           |
| Phenylalanine Degradation IV (Mammalian, via Side Chain)  | 3.98E-03 | 5.13E-02 | GOT1,SMOX                            |
| GADD45 Signaling                                          | 6.76E-03 | 9.09E-02 | CDKN1A,CCND1                         |
| Asparagine Biosynthesis I                                 | 7.41E-03 | 1.25E-01 | ASNS                                 |
| Estrogen-mediated S-phase Entry                           | 1.02E-02 | 7.14E-02 | CDKN1A,CCND1                         |
| D-myo-inositol (1,4,5)-Trisphosphate Biosynthesis         | 1.45E-02 | 5.26E-02 | PIP5K1B,PIP4K2A                      |

|                                                             |          |          |                                           |
|-------------------------------------------------------------|----------|----------|-------------------------------------------|
| Alanine Degradation III                                     | 1.48E-02 | 1.67E-01 | GPT                                       |
| Alanine Biosynthesis II                                     | 1.48E-02 | 1.67E-01 | GPT                                       |
| TR/RXR Activation                                           | 1.82E-02 | 3.12E-02 | UCP2,CYP7A1,NCOA4                         |
| Melatonin Degradation II                                    | 2.19E-02 | 8.33E-02 | SMOX                                      |
| Rapoport-Luebering Glycolytic Shunt                         | 2.19E-02 | 1E-01    | BPGM                                      |
| Glutamate Degradation II                                    | 2.19E-02 | 1E-01    | GOT1                                      |
| Heme Biosynthesis from Uroporphyrinogen-III I               | 2.88E-02 | 9.09E-02 | FECH                                      |
| Tetrapyrrole Biosynthesis II                                | 2.88E-02 | 7.69E-02 | ALAS2                                     |
| Spermine and Spermidine Degradation I                       | 2.88E-02 | 7.14E-02 | SMOX                                      |
| L-cysteine Degradation I                                    | 2.88E-02 | 9.09E-02 | GOT1                                      |
| Sertoli Cell-Sertoli Cell Junction Signaling                | 3.09E-02 | 2.05E-02 | EPB41,SPTB,CSDA (includes EG:56449),SPTA1 |
| Cell Cycle: G2/M DNA Damage Checkpoint Regulation           | 3.16E-02 | 4.17E-02 | CDC25B,CDKN1A                             |
| Rac Signaling                                               | 3.31E-02 | 2.46E-02 | PIP5K1B,PIP4K2A,ANK1                      |
| Tetrahydrofolate Salvage from 5,10-methenyltetrahydrofolate | 3.63E-02 | 9.09E-02 | MTHFD2                                    |
| dTMP De Novo Biosynthesis                                   | 3.63E-02 | 6.67E-02 | EHD4                                      |
| LXR/RXR Activation                                          | 3.89E-02 | 2.21E-02 | APOA4,CD36,CYP7A1                         |
| UDP-N-acetyl-D-glucosamine Biosynthesis II                  | 4.37E-02 | 5.88E-02 | FMO3                                      |
| 3-phosphoinositide Biosynthesis                             | 4.68E-02 | 2.82E-02 | PIP5K1B,PIP4K2A                           |
| Aspartate Degradation II                                    | 5.01E-02 | 7.14E-02 | GOT1                                      |
| Cell Cycle: G1/S Checkpoint Regulation                      | 5.62E-02 | 3.03E-02 | CDKN1A,CCND1                              |
| Histidine Degradation VI                                    | 5.75E-02 | 5E-02    | AMDHD1                                    |
| Eicosanoid Signaling                                        | 6.03E-02 | 2.5E-02  | ALOX15,PLA2G2A                            |
| Aryl Hydrocarbon Receptor Signaling                         | 6.31E-02 | 1.86E-02 | GSTA3,CDKN1A,CCND1                        |
| Glucocorticoid Biosynthesis                                 | 6.46E-02 | 4.76E-02 | CYP17A1                                   |
| Folate Transformations I                                    | 6.46E-02 | 3.03E-02 | MTHFD2                                    |
| Guanosine Nucleotides Degradation III                       | 7.08E-02 | 4.55E-02 | GDA                                       |
| Glycine Betaine Degradation                                 | 7.08E-02 | 4.35E-02 | SDS                                       |
| Androgen Biosynthesis                                       | 8.51E-02 | 3.85E-02 | CYP17A1                                   |
| Bile Acid Biosynthesis, Neutral Pathway                     | 8.51E-02 | 1.72E-02 | CYP7A1                                    |
| Cyclins and Cell Cycle Regulation                           | 8.91E-02 | 2.25E-02 | CDKN1A,CCND1                              |
| Isoleucine Degradation I                                    | 9.12E-02 | 3.33E-02 | SDS                                       |
| Regulation of Actin-based Motility by Rho                   | 9.33E-02 | 2.25E-02 | PIP5K1B,PIP4K2A                           |
| Tryptophan Degradation X (Mammalian, via Tryptamine)        | 9.77E-02 | 3.45E-02 | SMOX                                      |
| Putrescine Degradation III                                  | 9.77E-02 | 3.33E-02 | SMOX                                      |
| Valine Degradation I                                        | 1.11E-01 | 2.86E-02 | SDS                                       |
| Dopamine Degradation                                        | 1.24E-01 | 2.7E-02  | SMOX                                      |
| Pyrimidine Ribonucleotides Interconversion                  | 1.37E-01 | 2.78E-02 | CMPK2                                     |
| Glycolysis I                                                | 1.44E-01 | 2.22E-02 | BPGM                                      |
| Gluconeogenesis I                                           | 1.50E-01 | 2E-02    | BPGM                                      |
| HGF Signaling                                               | 1.55E-01 | 1.9E-02  | CDKN1A,CCND1                              |
| Glutathione-mediated Detoxification                         | 1.63E-01 | 2.22E-02 | GSTA3                                     |
| RhoA Signaling                                              | 1.65E-01 | 1.75E-02 | PIP5K1B,PIP4K2A                           |
| Fc Epsilon RI Signaling                                     | 1.70E-01 | 1.71E-02 | GRAP2,PLA2G2A                             |

|                                                             |          |          |                                |
|-------------------------------------------------------------|----------|----------|--------------------------------|
| Androgen Signaling                                          | 1.70E-01 | 1.4E-02  | NCOA4,CCND1                    |
| Noradrenaline and Adrenaline Degradation                    | 1.75E-01 | 1.92E-02 | SMOX                           |
| Fatty Acid $\beta$ -oxidation I                             | 1.87E-01 | 2.22E-02 | SDS                            |
| Serotonin Receptor Signaling                                | 1.87E-01 | 2.17E-02 | SMOX                           |
| p38 MAPK Signaling                                          | 1.88E-01 | 1.71E-02 | CDC25B,PLA2G2A                 |
| MIF-mediated Glucocorticoid Regulation                      | 1.99E-01 | 2.38E-02 | PLA2G2A                        |
| IL-12 Signaling and Production in Macrophages               | 2.02E-01 | 1.28E-02 | ALOX15,APOA4                   |
| Cell Cycle Regulation by BTG Family Proteins                | 2.05E-01 | 2.78E-02 | CCND1                          |
| Triacylglycerol Biosynthesis                                | 2.05E-01 | 2.17E-02 | ELOVL6                         |
| Stearate Biosynthesis I (Animals)                           | 2.22E-01 | 2E-02    | ELOVL6                         |
| Docosahexaenoic Acid (DHA) Signaling                        | 2.34E-01 | 2.04E-02 | ALOX15                         |
| MIF Regulation of Innate Immunity                           | 2.45E-01 | 2E-02    | PLA2G2A                        |
| Transcriptional Regulatory Network in Embryonic Stem Cells  | 2.45E-01 | 2.5E-02  | TCF7L1                         |
| D-myo-inositol-5-phosphate Metabolism                       | 2.45E-01 | 1.92E-02 | PIP4K2A                        |
| Xenobiotic Metabolism Signaling                             | 2.55E-01 | 1.01E-02 | GSTA3,FMO3,SMOX                |
| Serotonin Degradation                                       | 2.56E-01 | 1.32E-02 | SMOX                           |
| Tight Junction Signaling                                    | 2.75E-01 | 1.24E-02 | EPB41,CSDA (includes EG:56449) |
| Role of CHK Proteins in Cell Cycle Checkpoint Control       | 2.99E-01 | 1.79E-02 | CDKN1A                         |
| RhoGDI Signaling                                            | 3.05E-01 | 1.02E-02 | PIP5K1B,PIP4K2A                |
| Phospholipases                                              | 3.14E-01 | 1.52E-02 | PLA2G2A                        |
| ErbB2-ErbB3 Signaling                                       | 3.30E-01 | 1.67E-02 | CCND1                          |
| PXR/RXR Activation                                          | 3.34E-01 | 1.15E-02 | CYP7A1                         |
| ATM Signaling                                               | 3.34E-01 | 1.64E-02 | CDKN1A                         |
| Mitotic Roles of Polo-Like Kinase                           | 3.59E-01 | 1.45E-02 | CDC25B                         |
| Antiproliferative Role of Somatostatin Receptor 2           | 3.59E-01 | 1.41E-02 | CDKN1A                         |
| GM-CSF Signaling                                            | 3.59E-01 | 1.47E-02 | CCND1                          |
| Nicotine Degradation II                                     | 3.72E-01 | 9.71E-03 | FMO3                           |
| JAK/Stat Signaling                                          | 3.86E-01 | 1.43E-02 | CDKN1A                         |
| Dopamine Receptor Signaling                                 | 3.95E-01 | 1.06E-02 | SMOX                           |
| Actin Cytoskeleton Signaling                                | 4.04E-01 | 8.4E-03  | PIP5K1B,PIP4K2A                |
| VEGF Family Ligand-Receptor Interactions                    | 4.05E-01 | 1.19E-02 | PLA2G2A                        |
| VDR/RXR Activation                                          | 4.22E-01 | 1.23E-02 | CDKN1A                         |
| FXR/RXR Activation                                          | 4.22E-01 | 9.9E-03  | CYP7A1                         |
| CTLA4 Signaling in Cytotoxic T Lymphocytes                  | 4.35E-01 | 1.02E-02 | GRAP2                          |
| Phospholipase C Signaling                                   | 4.40E-01 | 7.69E-03 | GRAP2,PLA2G2A                  |
| Signaling by Rho Family GTPases                             | 4.45E-01 | 7.94E-03 | PIP5K1B,PIP4K2A                |
| Mouse Embryonic Stem Cell Pluripotency                      | 4.83E-01 | 1.01E-02 | TCF7L1                         |
| Protein Kinase A Signaling                                  | 4.85E-01 | 7.33E-03 | CDC25B,ADD2,TCF7L1             |
| iCOS-iCOSL Signaling in T Helper Cells                      | 4.98E-01 | 8.13E-03 | GRAP2                          |
| T Cell Receptor Signaling                                   | 4.98E-01 | 9.17E-03 | GRAP2                          |
| Role of NANOG in Mammalian Embryonic Stem Cell Pluripotency | 5.35E-01 | 8.77E-03 | TCF7L1                         |
| 14-3-3-mediated Signaling                                   | 5.37E-01 | 8.55E-03 | SNCA                           |
| CCR3 Signaling in Eosinophils                               | 5.37E-01 | 7.94E-03 | PLA2G2A                        |



|                                         |          |          |         |
|-----------------------------------------|----------|----------|---------|
| CD28 Signaling in T Helper Cells        | 5.37E-01 | 7.58E-03 | GRAP2   |
| PKC $\theta$ Signaling in T Lymphocytes | 5.37E-01 | 6.99E-03 | GRAP2   |
| Human Embryonic Stem Cell Pluripotency  | 5.86E-01 | 6.67E-03 | TCF7L1  |
| AMPK Signaling                          | 5.93E-01 | 6.02E-03 | PFKFB1  |
| Synaptic Long Term Depression           | 6.22E-01 | 6.29E-03 | PLA2G2A |
