# Supplementary material
Source: PubMed Central journal article supplement (PMC4540723)
Supplement: 12248_2015_9792_MOESM5_ESM.pdf [file 12248_2015_9792_MOESM5_ESM.pdf]

| <b>Supplementary Table 4: Ingenuity Canonical Pathways: Anakinra Vehicle Contrast</b> |                |              |                     |
|---------------------------------------------------------------------------------------|----------------|--------------|---------------------|
| <b>Canonical Pathways</b>                                                             | <b>p-value</b> | <b>Ratio</b> | <b>Genes</b>        |
| <b>24 h post-TBI</b>                                                                  |                |              |                     |
| Salvage Pathways of Pyrimidine Ribonucleotides                                        | 0.04           | 9.8E-03      | UPP2                |
| Role of NFAT in Regulation of the Immune Response                                     | 0.07           | 5.08E-03     | AKAP5               |
| Calcium Signaling                                                                     | 0.07           | 4.74E-03     | AKAP5               |
| cAMP-mediated signaling                                                               | 0.09           | 4.52E-03     | AKAP5               |
| Protein Kinase A Signaling                                                            | 0.16           | 2.44E-03     |                     |
| <b>72 h post-TBI</b>                                                                  |                |              |                     |
| PXR/RXR Activation                                                                    | 0.0002         | 3.45E-02     | NR1I3,IGFBP1,CYP2B6 |
| GADD45 Signaling                                                                      | 0.0005         | 9.09E-02     | GADD45A,GADD45G     |
| Retinol Biosynthesis                                                                  | 0.0026         | 3.28E-02     | AADAC,Ces2g         |
| Guanine and Guanosine Salvage I                                                       | 0.0041         | 1.11E-01     | HPRT1               |
| ATM Signaling                                                                         | 0.0055         | 3.28E-02     | GADD45A,GADD45G     |
| Growth Hormone Signaling                                                              | 0.0076         | 2.63E-02     | SOCS2,ONECUT1       |
| Adenine and Adenosine Salvage III                                                     | 0.0081         | 6.67E-02     | HPRT1               |
| Prolactin Signaling                                                                   | 0.0091         | 2.5E-02      | MYC,SOCS2           |
| VDR/RXR Activation                                                                    | 0.0098         | 2.47E-02     | GADD45A,IGFBP1      |
| Xenobiotic Metabolism Signaling                                                       | 0.0117         | 1.01E-02     | Ces2g,NR1I3,CYP2B6  |
| IGF-1 Signaling                                                                       | 0.0145         | 1.9E-02      | SOCS2,IGFBP1        |
| p38 MAPK Signaling                                                                    | 0.0200         | 1.71E-02     | MYC,IL1RN           |
| Ubiquinol-10 Biosynthesis (Eukaryotic)                                                | 0.0219         | 3.45E-02     | ECHDC1              |
| Aryl Hydrocarbon Receptor Signaling                                                   | 0.0257         | 1.24E-02     | MYC,Rarb            |
| Fatty Acid Activation                                                                 | 0.0257         | 5.26E-02     | ACSL3               |
| Oxidative Ethanol Degradation III                                                     | 0.0257         | 2.5E-02      | ACSL3               |
| Ethanol Degradation IV                                                                | 0.0302         | 3.45E-02     | ACSL3               |
| Mitochondrial L-carnitine Shuttle Pathway                                             | 0.0339         | 4.55E-02     | ACSL3               |
| $\gamma$ -linolenate Biosynthesis II (Animals)                                        | 0.0355         | 4E-02        | ACSL3               |
| Acute Phase Response Signaling                                                        | 0.0389         | 1.12E-02     | IL1RN,SOCS2         |
| Estrogen-mediated S-phase Entry                                                       | 0.0417         | 3.57E-02     | MYC                 |
| Triacylglycerol Degradation                                                           | 0.0490         | 3.03E-02     | AADAC               |
| Ethanol Degradation II                                                                | 0.0490         | 2.33E-02     | ACSL3               |
| Fatty Acid $\beta$ -oxidation I                                                       | 0.0550         | 2.22E-02     | ACSL3               |
| Role of JAK2 in Hormone-like Cytokine Signaling                                       | 0.0603         | 2.78E-02     | SOCS2               |
| IL-9 Signaling                                                                        | 0.0631         | 2.5E-02      | SOCS2               |
| Stearate Biosynthesis I (Animals)                                                     | 0.0661         | 2E-02        | ACSL3               |
| Role of Cytokines in Mediating Communication between Immune Cells                     | 0.0708         | 1.82E-02     | IL1RN               |

|                                                            |        |          |                     |
|------------------------------------------------------------|--------|----------|---------------------|
| Transcriptional Regulatory Network in Embryonic Stem Cells | 0.0741 | 2.5E-02  | ONECUT1             |
| Cell Cycle: G2/M DNA Damage Checkpoint Regulation          | 0.0741 | 2.08E-02 | GADD45A             |
| Retinoic acid Mediated Apoptosis Signaling                 | 0.0776 | 1.45E-02 | Rarb                |
| Bupropion Degradation                                      | 0.0776 | 1.92E-02 | CYP2B6              |
| Acetone Degradation I (to Methylglyoxal)                   | 0.0794 | 1.82E-02 | CYP2B6              |
| Heparan Sulfate Biosynthesis (Late Stages)                 | 0.0813 | 1.64E-02 | AADAC               |
| Estrogen Biosynthesis                                      | 0.1000 | 1.47E-02 | CYP2B6              |
| Cell Cycle: G1/S Checkpoint Regulation                     | 0.1000 | 1.52E-02 | MYC                 |
| Thrombopoietin Signaling                                   | 0.1038 | 1.59E-02 | MYC                 |
| ErbB2-ErbB3 Signaling                                      | 0.1038 | 1.67E-02 | MYC                 |
| Myc Mediated Apoptosis Signaling                           | 0.1074 | 1.67E-02 | MYC                 |
| Nicotine Degradation III                                   | 0.1074 | 1.1E-02  | CYP2B6              |
| Melatonin Degradation I                                    | 0.1074 | 1.2E-02  | CYP2B6              |
| ERK5 Signaling                                             | 0.1109 | 1.54E-02 | MYC                 |
| T Helper Cell Differentiation                              | 0.1146 | 1.39E-02 | BCL6                |
| Communication between Innate and Adaptive Immune Cells     | 0.1164 | 9.17E-03 | IL1RN               |
| Nicotine Degradation II                                    | 0.1199 | 9.71E-03 | CYP2B6              |
| IL-10 Signaling                                            | 0.1253 | 1.28E-02 | IL1RN               |
| JAK/Stat Signaling                                         | 0.1253 | 1.43E-02 | SOCS2               |
| FXR/RXR Activation                                         | 0.1393 | 9.9E-03  | IL1RN               |
| PDGF Signaling                                             | 0.1413 | 1.18E-02 | MYC                 |
| Neuregulin Signaling                                       | 0.1535 | 9.8E-03  | MYC                 |
| Apoptosis Signaling                                        | 0.1549 | 1.05E-02 | BCL2L11             |
| SAPK/JNK Signaling                                         | 0.1603 | 9.8E-03  | GADD45A             |
| Mouse Embryonic Stem Cell Pluripotency                     | 0.1652 | 1.01E-02 | MYC                 |
| PPAR Signaling                                             | 0.1671 | 9.52E-03 | IL1RN               |
| Cholecystinin/Gastrin-mediated Signaling                   | 0.1738 | 9.43E-03 | IL1RN               |
| LXR/RXR Activation                                         | 0.1871 | 7.35E-03 | IL1RN               |
| Estrogen Receptor Signaling                                | 0.2037 | 7.35E-03 | IGFBP1              |
| IL-6 Signaling                                             | 0.2037 | 8.06E-03 | IL1RN               |
| NF-κB Signaling                                            | 0.2541 | 5.71E-03 | IL1RN               |
| B Cell Receptor Signaling                                  | 0.2553 | 6.06E-03 | BCL6                |
| RAR Activation                                             | 0.2793 | 5.29E-03 | Rarb                |
| ILK Signaling                                              | 0.2825 | 5.21E-03 | MYC                 |
| Glucocorticoid Receptor Signaling                          | 0.3846 | 3.4E-03  | IL1RN               |
|                                                            |        |          |                     |
| <b>7 days post-TBI</b>                                     |        |          |                     |
| T Helper Cell Differentiation                              | 0.0005 | 4.17E-02 | HLA-DMA,FCER1G,BCL6 |
| Isoleucine Degradation I                                   | 0.0005 | 6.67E-02 | ACAT2,SDS           |

|                                                            |        |          |                |
|------------------------------------------------------------|--------|----------|----------------|
| Acetyl-CoA Biosynthesis III (from Citrate)                 | 0.0026 | 1.25E-01 | ACLY           |
| Epoxy-squalene Biosynthesis                                | 0.0051 | 1.11E-01 | SQLE           |
| Nur77 Signaling in T Lymphocytes                           | 0.0055 | 3.17E-02 | HLA-DMA,FCER1G |
| Cytotoxic T Lymphocyte-mediated Apoptosis of Target Cells  | 0.0065 | 2.35E-02 | HLA-DMA,FCER1G |
| Calcium-induced T Lymphocyte Apoptosis                     | 0.0076 | 2.86E-02 | HLA-DMA,FCER1G |
| OX40 Signaling Pathway                                     | 0.0076 | 2.13E-02 | HLA-DMA,FCER1G |
| Glutamate Degradation II                                   | 0.0078 | 1E-01    | GOT1           |
| L-cysteine Degradation I                                   | 0.0102 | 9.09E-02 | GOT1           |
| Growth Hormone Signaling                                   | 0.0123 | 2.63E-02 | SOCS2,ONECUT1  |
| CTLA4 Signaling in Cytotoxic T Lymphocytes                 | 0.0170 | 2.04E-02 | HLA-DMA,FCER1G |
| Aspartate Degradation II                                   | 0.0178 | 7.14E-02 | GOT1           |
| Ketolysis                                                  | 0.0204 | 5.56E-02 | ACAT2          |
| iCOS-iCOSL Signaling in T Helper Cells                     | 0.0240 | 1.63E-02 | HLA-DMA,FCER1G |
| Glutaryl-CoA Degradation                                   | 0.0257 | 4.17E-02 | ACAT2          |
| Ketogenesis                                                | 0.0257 | 4.76E-02 | ACAT2          |
| Mevalonate Pathway I                                       | 0.0257 | 3.57E-02 | ACAT2          |
| Glycine Betaine Degradation                                | 0.0257 | 4.35E-02 | SDS            |
| CD28 Signaling in T Helper Cells                           | 0.0295 | 1.52E-02 | HLA-DMA,FCER1G |
| PKC $\theta$ Signaling in T Lymphocytes                    | 0.0295 | 1.4E-02  | HLA-DMA,FCER1G |
| Lipid Antigen Presentation by CD1                          | 0.0309 | 4.35E-02 | FCER1G         |
| Bile Acid Biosynthesis, Neutral Pathway                    | 0.0309 | 1.72E-02 | CYP7A1         |
| Cholesterol Biosynthesis I                                 | 0.0331 | 2.5E-02  | SQLE           |
| Phenylalanine Degradation IV (Mammalian, via Side Chain)   | 0.0331 | 2.56E-02 | GOT1           |
| Cholesterol Biosynthesis II (via 24,25-dihydrolanosterol)  | 0.0331 | 2.5E-02  | SQLE           |
| Cholesterol Biosynthesis III (via Desmosterol)             | 0.0331 | 2.5E-02  | SQLE           |
| Cdc42 Signaling                                            | 0.0363 | 1.13E-02 | HLA-DMA,FCER1G |
| Valine Degradation I                                       | 0.0407 | 2.86E-02 | SDS            |
| Insulin Receptor Signaling                                 | 0.0407 | 1.41E-02 | SGK1,ACLY      |
| B Cell Development                                         | 0.0501 | 3.03E-02 | HLA-DMA        |
| Pyrimidine Ribonucleotides Interconversion                 | 0.0501 | 2.78E-02 | CTPS1          |
| Role of NFAT in Regulation of the Immune Response          | 0.0562 | 1.02E-02 | HLA-DMA,FCER1G |
| Hematopoiesis from Pluripotent Stem Cells                  | 0.0646 | 1.59E-02 | FCER1G         |
| Antigen Presentation Pathway                               | 0.0676 | 2.5E-02  | HLA-DMA        |
| Fatty Acid $\beta$ -oxidation I                            | 0.0708 | 2.22E-02 | SDS            |
| Role of JAK2 in Hormone-like Cytokine Signaling            | 0.0776 | 2.78E-02 | SOCS2          |
| IL-9 Signaling                                             | 0.0794 | 2.5E-02  | SOCS2          |
| Netrin Signaling                                           | 0.0891 | 1.75E-02 | ABLIM3         |
| cAMP-mediated signaling                                    | 0.0891 | 9.05E-03 | DUSP1,DUSP6    |
| Transcriptional Regulatory Network in Embryonic Stem Cells | 0.0933 | 2.5E-02  | ONECUT1        |

|                                                        |        |          |                   |
|--------------------------------------------------------|--------|----------|-------------------|
| Retinol Biosynthesis                                   | 0.0933 | 1.64E-02 | Ces2g             |
| G-Protein Coupled Receptor Signaling                   | 0.1135 | 5.69E-03 | DUSP1,DUSP6,RGS16 |
| Glucocorticoid Receptor Signaling                      | 0.1256 | 6.8E-03  | DUSP1,SGK1        |
| PXR/RXR Activation                                     | 0.1330 | 1.15E-02 | CYP7A1            |
| ERK5 Signaling                                         | 0.1396 | 1.54E-02 | SGK1              |
| Pyridoxal 5'-phosphate Salvage Pathway                 | 0.1396 | 1.39E-02 | SGK1              |
| CCR5 Signaling in Macrophages                          | 0.1419 | 1.06E-02 | FCER1G            |
| Communication between Innate and Adaptive Immune Cells | 0.1466 | 9.17E-03 | FCER1G            |
| JAK/Stat Signaling                                     | 0.1574 | 1.43E-02 | SOCS2             |
| IL-4 Signaling                                         | 0.1574 | 1.27E-02 | HLA-DMA           |
| Prolactin Signaling                                    | 0.1706 | 1.25E-02 | SOCS2             |
| FXR/RXR Activation                                     | 0.1750 | 9.9E-03  | CYP7A1            |
| Salvage Pathways of Pyrimidine Ribonucleotides         | 0.1750 | 9.8E-03  | SGK1              |
| TR/RXR Activation                                      | 0.1791 | 1.04E-02 | CYP7A1            |
| SAPK/JNK Signaling                                     | 0.2004 | 9.8E-03  | FCER1G            |
| IGF-1 Signaling                                        | 0.2109 | 9.52E-03 | SOCS2             |
| Natural Killer Cell Signaling                          | 0.2128 | 8.62E-03 | FCER1G            |
| Fc Epsilon RI Signaling                                | 0.2312 | 8.55E-03 | FCER1G            |
| Protein Kinase A Signaling                             | 0.2328 | 4.89E-03 | DUSP1,DUSP6       |
| LXR/RXR Activation                                     | 0.2328 | 7.35E-03 | CYP7A1            |
| p38 MAPK Signaling                                     | 0.2449 | 8.55E-03 | DUSP1             |
| NF-κB Signaling                                        | 0.3126 | 5.71E-03 | FCER1G            |
| B Cell Receptor Signaling                              | 0.3148 | 6.06E-03 | BCL6              |
| EIF2 Signaling                                         | 0.3236 | 4.95E-03 | RPL32             |
| Acute Phase Response Signaling                         | 0.3342 | 5.62E-03 | SOCS2             |
| RAR Activation                                         | 0.3428 | 5.29E-03 | DUSP1             |
| Phospholipase C Signaling                              | 0.4102 | 3.85E-03 | FCER1G            |
| Xenobiotic Metabolism Signaling                        | 0.4634 | 3.36E-03 | Ces2g             |
| Axonal Guidance Signaling                              | 0.6138 | 2.27E-03 | ABLIM3            |
